1 **Anabolic SIRT4 exerts retrograde control over TORC1 signalling**

2 **by glutamine sparing in the mitochondria**

3 **Eisha Shaw<sup>1</sup>, Manasi Talwadekar<sup>1</sup>, Nitya Mohan<sup>1,2</sup>, Aishwarya Acharya<sup>1,3</sup>, Ullas Kolthur-**  
4 **Seetharam<sup>1#</sup>**

5

6 <sup>1</sup> Department of Biological Sciences, Tata Institute of Fundamental Research, Colaba, Mumbai,  
7 India

8

9 Running title: Anabolic SIRT4 regulates mTORC1 signalling

10

11 #Address Correspondence to: Ullas Kolthur-Seetharam, PhD; Email: [ullas@tifr.res.in](mailto:ullas@tifr.res.in); Phone: +91-  
12 22-22782721

13 <sup>2</sup>Present address: Immunotherapy and Immunoprevention, German Cancer Research Centre  
14 (DKFZ), Heidelberg, Germany

15 <sup>3</sup>Present address: Max Planck Institute for Biology of Ageing, Cologne, Germany

16

17 Word count (Introduction, results and discussion): 4631

18 Word count (Materials and Methods): 1622

## 19 **Abstract**

20 Anabolic and catabolic signalling mediated via mTOR and AMPK have to be intrinsically  
21 coupled to mitochondrial functions for maintaining homeostasis and mitigate cellular/organismal  
22 stress. Although, glutamine is known to activate mTOR, if/how differential mitochondrial utilization  
23 of glutamine impinges on mTOR signalling is less explored. Mitochondrial SIRT4, which unlike  
24 other sirtuins is induced in a fed state, is known to inhibit catabolic signalling/pathways through  
25 AMPK-PGC1a/SIRT1-PPAR $\alpha$  axis and negatively regulate glutamine metabolism via TCA cycle.  
26 However, physiological significance of SIRT4 functions during a fed state is still unknown. Here,  
27 we establish SIRT4 as key anabolic factor that activates TORC1 signalling and regulates  
28 lipogenesis, autophagy and cell proliferation. Mechanistically, we demonstrate that the ability of  
29 SIRT4 to inhibit anaplerotic conversion of glutamine to  $\alpha$ -ketoglutarate potentiates TORC1.  
30 Interestingly, we also show that mitochondrial glutamine sparing or utilization is critical for  
31 differentially regulating TORC1 under fed and fasted conditions. Moreover, we conclusively show  
32 that differential expression of SIRT4 during fed and fasted states is vital for coupling mitochondrial  
33 energetics and glutamine utilization with anabolic pathways. These significant findings also  
34 illustrate that SIRT4 integrates nutrient inputs with mitochondrial retrograde signals to maintain a  
35 balance between anabolic and catabolic pathways.

## 36 Introduction

37 It is intuitive that the ability to uptake and utilize macronutrients for catabolic or anabolic  
38 purposes is intrinsically linked with cellular and organismal energetics. Thus, the sensing and  
39 utilization of various macronutrients in the mitochondria needs to be coupled to the activity of  
40 metabolic sensors in the cytosol such as AMPK (AMP-activated kinase) and mTOR (mammalian  
41 Target of Rapamycin), in order to orchestrate a balance between the metabolic state of the cell and  
42 external stimuli. AMPK, mTOR and Sirtuins (Sir2-like NAD-dependent deacylases) have been well  
43 established to play central roles in linking nutrient and energetic status to cellular and organismal  
44 physiology (1-5). While the AMPK-Sirtuin (6-9) and AMPK-mTOR (10, 11) cross talks are well  
45 worked out, the relative interdependence and hierarchy of signals between these sensors is not well  
46 explored. Further, functional interactions between Sirtuins and mTOR are poorly understood, and  
47 are largely limited to SIRT1 (12-14).

48 Anaplerotic pathways are essential to maintain physiological homeostasis under  
49 carbohydrate deprivation states. Increased utilization of glutamine via  $\alpha$ -ketoglutarate ( $\alpha$ -KG),  
50 largely determined by the activity of glutamate dehydrogenase (GDH) within the mitochondria, is  
51 important under both normal and pathophysiological conditions, including cancer (15, 16).  
52 Interestingly, both  $\alpha$ -KG and glutamine have been recently reported to impact TORC1 signalling  
53 (17, 18). However, under normal physiological settings if/how differential mitochondrial uptake and  
54 utilization of glutamine affect TORC1 is still unknown. In this context, mTOR is both activated and  
55 inhibited by  $\alpha$ -KG (18, 19). While glutaminolysis that generates  $\alpha$ -KG was shown to induce mTOR  
56 in cancer cells (18),  $\alpha$ -KG-mediated inhibition of mitochondrial ATP-synthase led to lifespan  
57 extension via mTOR inhibition (19). These are clearly contradictory findings and hence further

58 investigation is required to unravel the significance of mitochondrial glutamine utilization in  
59 regulating anabolic-signalling via TORC1. Moreover, if and how mechanisms within the  
60 mitochondria that determine anaplerotic flux and energetics regulate TORC1 remains to be  
61 addressed. Specifically, it is enticing to check if mitochondrial utilization or sparing of glutamine  
62 acts as an intracellular cue to regulate metabolic signalling.

63 Sirtuins are typically associated with physiological responses during fasting or calorie  
64 restricted states (3). Intriguingly however, SIRT4, a *bona-fide* mitochondrial sirtuin, is induced  
65 under a fed state (20). Although, reports have shown that it has ADP-ribosyltransferase (21, 22) and  
66 NAD<sup>+</sup> dependent deacylase activities (23, 24), the robust catalytic activity as well as biological  
67 functions of SIRT4 is largely unknown. More importantly, while SIRT4 is established to counter  
68 catabolic signalling and negatively regulate fatty acid oxidation (20, 21, 25), whether it affects  
69 anabolic-signalling remains unclear.

70 It should be noted that glutamate dehydrogenase (GDH) has been demonstrated to be a *bona-*  
71 *fide* substrate of SIRT4 and this is critical for glutamine homeostasis (22, 26, 27). Particularly in  
72 cancers, SIRT4-GDH-glutamine axis is known to affect cell proliferation (28) and TORC1 is known  
73 to inhibit SIRT4 expression (29). However, the link between SIRT4 and TORC1 under normal  
74 physiological conditions needs to be unravelled. It is important to note that unlike in cancers, both  
75 SIRT4 and TORC1 are induced under fed states (20). Moreover, mTOR-dependent anabolic  
76 pathways including protein synthesis and lipogenesis are energetically demanding and aberrant  
77 activation of mTOR has been shown to cause energetic stress (30). Hence, given that SIRT4  
78 expression is higher in a fed state, it is enticing to investigate if coupling of mitochondrial  
79 metabolism/energetics with mTOR is brought about by SIRT4.

80 Here, we report that anaplerotic flux, specifically, utilization/sparing of glutamine in the  
81 TCA cycle constitutes a key signal mediating TORC1 activation. We, further demonstrate that  
82 SIRT4 presence or absence phenocopies TORC1 signalling under a nutrient replete or deprived  
83 state, respectively. Thus, our study provides insights into the crucial role of SIRT4 in activating  
84 TORC1 in response to nutrients, via modulation of glutamine utilization. We also demonstrate that  
85 SIRT4 enhances lipogenesis and cell proliferation, and inhibits cellular autophagy. Together we  
86 highlight SIRT4 as an anabolic sirtuin and bring to the fore the importance of mitochondrial inputs  
87 in regulating metabolic signalling.

88

## 89 **Results**

### 90 **Mitochondrial Glutamine sparing activates TORC1**

91 Glutamine is a potent regulator of TORC1 activity (17, 18). However, whether altered  
92 glutamine flux under physiological conditions that mimic fed or fasted states affect mTOR  
93 signalling is still unclear. Towards this, primary hepatocytes, pre-incubated in amino acid- and  
94 serum-free media, were treated with 2mM glutamine in the presence of either low (5mM) or high  
95 (25mM) glucose. mTOR signalling, as assessed by phosphorylation of downstream substrate S6K  
96 (pS6K), was low in glucose-alone supplemented conditions. Addition of glutamine led to a robust  
97 increase in mTOR activity, more than in the presence of leucine and isoleucine (Fig. 1A).  
98 Interestingly, glutamine-dependent activation of mTOR signalling was highest under high glucose  
99 conditions, over and above the other treatments (Fig. 1A). In contrast to this, Leucine/Isoleucine  
100 activated mTOR signalling to similar extents under both low- and high-glucose conditions (Fig. 1A).  
101 Consistently, we found similar glucose-dependent glutamine-mediated increase in mTOR signalling

102 even when hepatocytes were grown in complete media in the presence of amino acids and serum  
103 (Fig. 1B). It is intriguing that the effect of glutamine on pS6K under low glucose conditions was still  
104 evident in the absence of serum and amino acids and indicates a possible graded response, which is  
105 dependent upon other inputs. Nevertheless, mTOR signalling was robustly induced in high glucose,  
106 but not under low glucose conditions, irrespective of serum and other amino acids mediated effects  
107 (Fig 1A and B). Together, these suggested that glutamine effects on mTOR are potentiated in the  
108 presence of high glucose. Importantly, this led us to further investigate if differential glutamine  
109 utilization within the mitochondria, as under fed and fasted states, controls extent of mTOR  
110 signalling.

111         Reduced carbohydrate availability increases anaplerotic flux of glutamine into the TCA  
112 cycle, which is regulated by the activity of GDH (31). Thus, we surmised that inhibition of GDH,  
113 which would lower glutamine channelling into TCA, could potentiate mTOR signalling. As evident  
114 from Figure 1C, a short-term inhibition of GDH in primary hepatocytes led to significant increase in  
115 pS6K. It should be noted that this increase was seen even when cells were grown under low glucose  
116 conditions, possibly due to reduced utilization of glutamine via the TCA. To confirm if this was  
117 indeed true, we also inhibited glutaminase (GLS) that converts glutamine to glutamate, which is  
118 then fed into TCA via GDH. Inhibition of GLS led to a significant increase in pS6K levels (Fig 1D)  
119 and the effects were similar to GDH inhibition (Fig 1C). It is important to note that activation of  
120 mTOR signalling following GDH or GLS inhibition under low glucose conditions was comparable  
121 to glutamine supplementation under high glucose conditions. Together these results demonstrate  
122 that, under fasted and fed conditions, differential glutamine utilization (or sparing) by the  
123 mitochondria is used as a nutrient cue to regulate mTOR in the cytosol.

124

## 125 **SIRT4 regulates TORC1 signalling**

126 GDH activity and thus glutamine utilization in the mitochondria is known to be highly  
127 regulated during fed and fast conditions (31). Thus, we wanted to identify the molecular factor  
128 within the mitochondria that would mediate such effects on mTOR via glutamine. Among others,  
129 mitochondrial deacylase SIRT4 has been shown to be a potent regulator of GDH activity and  
130 anaplerotic flux (21, 22). Moreover, although SIRT4 is induced under a fed state (20, 32), functional  
131 significance of elevated SIRT4 levels in nutrient excess conditions is still unknown. Specifically,  
132 whether differential SIRT4 levels couple glutamine flux through TCA to control anabolic-signalling  
133 remains to be addressed.

134 To investigate this, we used either SIRT4 gain-of-function (ectopic expression) or loss-of-  
135 function (knockdown or knock out) models under different metabolic states. Given that SIRT4  
136 levels and mTOR signalling is low under fasted conditions, we assessed the effects of SIRT4  
137 overexpression under fasted (or low glucose) conditions. We found that ectopic expression of SIRT4  
138 led to a robust increase in pS6K, across cell types (Figs 1E, S1A and C, S2A). mTOR is known to  
139 exist in two complexes viz. TORC1 and TORC2, and phosphorylation of pS6K and pAKT-S473 are  
140 typically used as bona fide indicators of signalling via either of these arms. On assessing pAKT-  
141 S473 under similar conditions, we did not find SIRT4-dependent TORC2 activation (Fig 1F). This  
142 highlighted that SIRT4 has a specific effect on mTORC1 signalling. Rapamycin, the well-known  
143 inhibitor of mTOR has been used to decrease signalling downstream to mTORC1, particularly at  
144 low doses (33). Consistently, we found that treating with Rapamycin significantly reduced pS6K

145 levels in both control and SIRT4 overexpressing cells (Fig 1G). Thus together, our data  
146 demonstrates that SIRT4 positively regulates TORC1 signalling, which is sensitive to rapamycin.

147         Although, TORC1 has several downstream target proteins, emerging literature indicates that  
148 phosphorylation could be highly specific based on both substrate affinities and extent of activation  
149 (34, 35). Hence, we wanted to check if SIRT4-dependent activation of TORC1 led to  
150 phosphorylation of 4E-BP1, a translation repressor protein and ULK-1, which is involved in  
151 autophagy. We were surprised to find that while SIRT4-dependent TORC1 activation led to an  
152 increase in pS6K (Fig 1E, S2A) and pULK (S757) levels (Fig S2B), phosphorylation of 4E-BP1 was  
153 unaltered (Fig S2C). Although intriguing, it is now well established that 4E-BP1 is a preferred  
154 substrate of TORC1 and whereas its phosphorylation is resistant to Rapamycin treatment (33),  
155 complete starvation leads to a loss of p4E-BP1. These suggest that while minimal TORC1 activity is  
156 sufficient to phosphorylate 4E-BP1 (possibly maximally), phosphorylation of substrates like S6K is  
157 dependent on extent of mTOR activation.

158         Consistent with the results described above, knock down of SIRT4 led to a significant  
159 decrease in TORC1 signalling (Figs S2D-E and G and S1B). Here again, phosphorylation of 4E-  
160 BP1 remained unaltered, similar to when SIRT4 was ectopically expressed, indicating differential  
161 effect with regards to SIRT4-dependent control of TORC1 (Figs S2F). Importantly, TORC1  
162 signalling was drastically reduced in primary hepatocytes from *SIRT4*<sup>-/-</sup> mice when compared to the  
163 controls (Fig 1H). Furthermore, restoring SIRT4 expression in primary hepatocytes derived from  
164 *SIRT4*<sup>-/-</sup> mice increased pS6K to levels comparable to controls, indicating rescue of TORC1  
165 signalling (Figs 1H and S1D). These experiments using knock down or knockout of SIRT4 not only



166 ruled out the possibility of overexpression-based artefacts, but clearly established SIRT4 as a key  
167 determinant of TORC1 signalling.

168 Even though until now SIRT4-dependent control of TORC1 was unknown, mTOR has been  
169 previously shown to negatively regulate *Sirt4* expression. But it should be noted that, this was  
170 shown in cancer cells (29) and it is unlikely to apply to normal physiological contexts. Importantly,  
171 SIRT4 protein levels and TORC1 signalling are highest under nutrient excess or fed states, across  
172 cells and tissues (2, 20, 25). Hence, given that both are induced in a fed state it is difficult to  
173 envisage a negative interaction between these factors under normal physiological conditions.  
174 Nonetheless, we wanted to check if mTOR inhibition affected *Sirt4* mRNA levels in primary  
175 hepatocytes. Unlike in cancer cells (29), we did not find *Sirt4* expression to be altered in response to  
176 Rapamycin (Fig S2H). These results clearly demonstrate that mitochondrial SIRT4 is a positive  
177 regulator of TORC1 signalling in non-cancerous cells/tissues.

178

### 179 **SIRT4 potentiates nutrient- and growth factor-dependent activation of mTORC1**

180 Next, we wanted to explore the possibility of mitochondrial SIRT4 in potentiating or  
181 eliciting maximal TORC1 signalling. Interestingly, ectopic expression of SIRT4 under low glucose  
182 conditions, when its expression is otherwise diminished (Figs S1A and C), significantly upregulated  
183 TORC1 mediated phosphorylation of S6K, across cell types including in primary hepatocytes (Figs  
184 2A and S3A-B). Notably, this was comparable to signalling in control-transfected cells, which were  
185 grown under high glucose conditions. Importantly, *SIRT4*<sup>-/-</sup> hepatocytes under both low and high  
186 glucose conditions exhibit a robust decrease in pS6K, which was rescued upon SIRT4 expression  
187 (Fig 2B), and this was reminiscent of control-transfected cells grown in low glucose containing

188 media (Fig 2A). These results clearly indicated that while ectopic expression of SIRT4 mimics  
189 mTORC1 signalling under a high nutrient state, its knockdown phenocopied signalling in low  
190 glucose conditions.

191 Next, given that nutrients and growth factors in the serum are potent activators of mTOR, we  
192 wanted to assess the interplay between serum/amino-acid inputs and SIRT4 in regulating TORC1  
193 signalling. As expected, serum- and amino acid- deprivation led to a stark decrease in TORC1  
194 signalling in both control and SIRT4 transfected cells (Fig 2C). Despite this decrease, we noticed  
195 that pS6K levels were still higher in SIRT4 transfected cells following serum- and amino acid-  
196 withdrawal, compared to control transfected cells (Figs 2C). This was interesting and indicated that  
197 ectopic expression of SIRT4 led to sustenance of TORC1 signalling even after upstream inputs were  
198 withdrawn. This could also have possibly arisen due to delayed attenuation kinetics of mTOR  
199 signalling, which needs to be investigated in the future. These results clearly indicate that levels of  
200 SIRT4 lead to differential TORC1 signalling in response to various inputs, which have been  
201 otherwise shown to be key for TORC1 activation. Importantly, SIRT4 seems to potentiate and  
202 hence, regulate anabolic-signalling mediated by TORC1.

203

#### 204 **SIRT4-dependent glutamine sparing mediates TORC1 activation**

205 It was striking to note the similarity between the glutamine-mediated increase in TORC1  
206 signalling under high glucose and in a SIRT4-dependent response under low glucose (Fig 1). This  
207 prompted us to ask if SIRT4, whose expression is highest under a fed state, exerted control over  
208 TORC1 signalling via glutamine. Inhibiting mitochondrial glutamine utilization in control  
209 transfected cells, using EGCG or BPTES (inhibitors of GDH and GLS respectively), as shown

210 earlier (Figs 1C-D), led to significant increase in pS6K levels and this increase was comparable to  
211 that observed in cells transfected with SIRT4 (Figs 3A and B). Interestingly, EGCG and BPTES  
212 treatments in SIRT4 transfected cells led to a further increase in TORC1 signalling as assessed by  
213 pS6K/S6K ratios. This strongly suggested, for most part, the likelihood of SIRT4-dependent  
214 regulation of TORC1 being brought about by differential utilization of glutamine in the  
215 mitochondria. Moreover, earlier studies both in cancers and in beta-islets have clearly established  
216 SIRT4 as a key factor in regulating glutamine utilization via the TCA cycle, which is brought about  
217 by SIRT4-mediated inhibition of GDH activity (22, 36). Thus, we hypothesized that mechanistically  
218 SIRT4-dependent glutamine sparing by the mitochondria might activate TORC1, as under a fed  
219 state.

220         Towards this, we first checked if the observed effects of SIRT4 on TORC1 were because of  
221 altered glutamine channelling into the TCA cycle, specifically under low glucose conditions. As  
222 expected, we found that glutamine supplementation led to elevated  $\alpha$ -KG levels, which was  
223 accompanied by a small increase in TORC1 signalling in control cells (Fig 3C).  $\alpha$ -KG levels did not  
224 decrease upon SIRT4 overexpression in low glucose containing media without glutamine  
225 supplementation, nonetheless this led to activation of TORC1 (Fig 3C). However, it is important to  
226 note that unlike in control cells, while  $\alpha$ -KG levels did not increase in SIRT4 transfected cells  
227 following glutamine supplementation, phosphorylation of S6K was significantly higher (Fig 3C).  
228 Thus, the reciprocal changes in glutamine utilization and extent of S6K phosphorylation, which was  
229 dependent upon SIRT4 expression, clearly indicated that differential channelling of glutamine into  
230 TCA cycle regulated TORC1 in the cytosol (Fig 3C and D). These findings were corroborated by  
231 enhanced GDH activity in primary hepatocytes from *SIRT4*<sup>-/-</sup> mice, which was reduced to control

232 levels when SIRT4 expression was restored (Fig 3F, S4B and C). Importantly, rescuing SIRT4 in  
233 primary hepatocytes isolated from *SIRT4*<sup>-/-</sup> mice, which results in rescue of pS6K to wildtype levels  
234 (Fig 1H), led to a similar response to glutamine as is seen in hepatocytes derived from wildtype  
235 mice (Figs 3E). Based on these results, we conclude that SIRT4-mediated ‘glutamine sparing’  
236 contributes to TORC1 activation.

237

### 238 **SIRT4-AMPK axis also exerts control over TORC1 signalling**

239 Together with the results presented in Fig 3A and 3B, the additive increase in pS6K  
240 following glutamine and SIRT4 supplementation suggested that SIRT4-mediated control of TORC1  
241 was also dependent upon another cue. We have earlier established that in the absence of SIRT4,  
242 reduced cellular ATP (and an increase in AMP/ATP ratio) leads to AMPK activation (20). Further,  
243 AMPK is an upstream inhibitor of TORC1 (37). Thus, we wanted to assess whether SIRT4-  
244 mediated inhibition of AMPK also contributed to TORC1 activation. Activation of AMPK by  
245 AICAR led to a drastic reduction in pS6K in both control and SIRT4 over expressing cells (Fig.  
246 3G), and this decrease was not rescued by glutamine supplementation. Conversely, inhibiting  
247 AMPK in SIRT4 KO hepatocytes using compound-C led to an increase in pS6K levels. Importantly,  
248 this was further enhanced upon SIRT4 rescue (Fig. S4E). Together, these results clearly established  
249 that SIRT4 exerted a dual control over TORC1 signalling i.e. via both glutamine and AMPK.

250

251

252

## 253 **SIRT4 regulates mTOR localization to the lysosomes**

254 Lysosomal localization of mTOR is essential for its activation (38) and since it is a direct  
255 readout of the extent of activation, we assessed the same as a function of SIRT4 expression in  
256 primary hepatocytes from control and *SIRT4*<sup>-/-</sup> mice. We observed a drastic reduction in mTOR  
257 localization to lysosomes in *SIRT4*<sup>-/-</sup> hepatocytes compared to wild type under low glucose  
258 conditions, which was rescued upon SIRT4 expression (Fig 4A, C). Importantly, there was a marked  
259 increase in mTOR intensity on the lysosomes in glutamine supplemented SIRT4 overexpressing  
260 cells (Fig 4B-C). These not only corroborated the biochemical data but also confirmed that SIRT4  
261 was essential for activation of anabolic-signalling via TORC1.

262

## 263 **SIRT4-TOR axis impinges on transcription via SREBP1 activation**

264 In lipogenic cells, activation of SREBP1c, the master transcriptional regulator of lipid  
265 metabolism, is primarily dependent on TORC1 activity (39). Although, previously others and we  
266 have established SIRT4 as a negative regulator of transcription of fatty acid oxidation genes, if/how  
267 it controls transcription of lipogenic genes is still unknown. Thus, we assessed if SIRT4-TORC1  
268 axis leads to SREBP1c activation, again specifically under low glucose conditions to negate for  
269 other inputs. Ectopic expression of SIRT4 led to a robust increase in luciferase expression  
270 downstream to FAS (Fatty acid Synthetase) promoter under low glucose conditions, which was  
271 equivalent to high glucose states (Fig. 5A). Further, we found that the endogenous levels of  
272 transcripts of lipogenic genes such as FAS and SCD1 (Stearyl CoA Desaturase) were low in *SIRT4*<sup>-/-</sup>  
273 hepatocytes (Fig 5B). Importantly, expression of these SREBP1c target genes were restored to wild  
274 type levels when SIRT4 expression was rescued in *SIRT4*<sup>-/-</sup> hepatocytes. (Fig. 5B). Interestingly,

275 glutamine supplementation to cells overexpressing SIRT4 led to a robust increase in FAS expression  
276 even under low glucose conditions (Fig. 5C). However, glutamine supplementation to *SIRT4*<sup>-/-</sup>  
277 hepatocytes led to no increase in FAS expression, which was rescued upon SIRT4 restoration (Fig.  
278 5D). Further, on assaying for lipid content by oil red staining, we found that *SIRT4*<sup>-/-</sup> hepatocytes  
279 had reduced lipid droplets, which was again restored to control level following rescue of SIRT4  
280 expression (Fig. S5). These clearly demonstrate that SIRT4 activates lipogenic response in  
281 hepatocytes and together with previous findings (32), indicate that it maintains the balance between  
282 lipid synthesis and breakdown.

283

#### 284 **Anabolic SIRT4 exerts control over autophagy and cell proliferation**

285 Balance between AMPK and mTOR (specifically TORC1) signalling is critical to couple  
286 cellular metabolic/energetic state to catabolic/anabolic pathways, which determine processes like  
287 autophagy and cell proliferation/growth. Taking together our previous report on SIRT4-dependent  
288 inhibition of AMPK and the current findings on the ability of SIRT4 to activate TORC1, we wanted  
289 to assess the physiological relevance of SIRT4 expression. Specifically, we wanted to ascertain if  
290 anabolic SIRT4 could impinge on autophagy and cell proliferation.

291 On assessing the ratio of LC3-II to LC3-I, an indicator of autophagy, we saw a significant  
292 decrease in LC-II/LC3-I in SIRT4 over expressing cells (Fig 5E). Conversely, there was a robust  
293 increase in LC3-II/LC3-I ratio in SIRT4 knockdown cells (Fig 5F). While LC3-II/LC3-I ratio is  
294 indicative of extent of autophagy, it is not confirmatory. As established, we checked the autophagy  
295 flux by treating cells with leupeptin, which inhibits lysosomal proteases (40), and assaying for LC3-  
296 II/Actin ratio. Consistent with literature, we observed high autophagy flux in control transfected

297 cells under low glucose conditions (Fig 5G). Interestingly, ectopic expression of SIRT4 under low  
298 glucose conditions dampened this response (Fig 5H) and was comparable to autophagy flux of  
299 control transfected cells grown in media containing high glucose (Fig 5I). On the other hand,  
300 knocking down SIRT4 expression in cells grown in high glucose media led to a significant increase  
301 in LC3-II (Fig 5J), which was similar to control transfected cells under low glucose conditions (Fig  
302 5G). These clearly indicated that presence or absence of SIRT4 affected cellular autophagy and  
303 mimicked either a fed or fasted state, respectively and was consistent with change in TORC1  
304 signalling (Fig 2).

305 In the context of autophagy, AMPK and TORC1 counteract each other by phosphorylating  
306 the common downstream substrate ULK1. Notably, TORC1 mediated inhibitory phosphorylation of  
307 ULK1 at Ser-757 (pULK757) has been shown to prevent AMPK-dependent activatory  
308 phosphorylation at Ser-317/777 (41). Thus, the effects of SIRT4 on autophagy are consistent with  
309 changes in the levels of pULK757 (Fig S2B and S2E).

310 To get another correlate of SIRT4-dependent effects on cellular physiology, we scored for  
311 cell proliferation, which is again inherently linked with AMPK and mTOR activities (42). As  
312 anticipated while cells expressing SIRT4 were more proliferative (Figs 5K, and S1A), knocking  
313 down SIRT4 led to reduced proliferation, as compared to respective controls (Figs 5L and S1B).  
314 This was again consistent with the ability of SIRT4 to induce anabolic-signalling with TORC1.

315

316

317

## 318 **Discussion**

319 Catabolic and anabolic pathways/processes are intrinsically dependent upon the ability of  
320 cells to sense nutrient availability and have been largely studied under deprivation conditions.  
321 However, if and how intracellular utilization of one macronutrient affects the ability of the other to  
322 impinge on metabolic signalling is relatively less understood. Specifically, glutamine is utilized via  
323 anaplerotic pathways under starvation (43) and is also known to activate mTOR signalling (17, 18).  
324 Hence, whether differential glutamine utilization in the mitochondria, which is dependent upon fed  
325 or fasted state of the cell, affects cytosolic TOR is still unclear. Here, we have demonstrated that  
326 glutamine sparing by the mitochondria is key for TORC1 activation. Importantly, we establish that  
327 SIRT4, a sirtuin that is particularly abundant in the fed state, plays a crucial role in regulating  
328 TORC1 signalling through glutamine utilization in the mitochondria.

329 Despite several studies, SIRT4 activity and its functions have remained enigmatic. More  
330 importantly, unlike all other sirtuins, which are induced in a fasted state, SIRT4 expression is  
331 highest in a fed state (20). As emphasized earlier, SIRT4 has only been described for its role as an  
332 anti-catabolic factor (25, 32). Given this, we report its role as a mediator of anabolic-signalling via  
333 TORC1, which was hitherto unknown. In this context, we have assessed the importance of SIRT4-  
334 dependent activation of anabolic TORC1 in lipogenesis, cell proliferation and autophagy. We  
335 conclusively show that while SIRT4 enhances lipogenesis and cell proliferation, it down regulates  
336 autophagy. Others and we have established that the anti-catabolic role of SIRT4 is mediated via the  
337 inhibition of AMPK, PGC1 $\alpha$ , SIRT1 and PPAR $\alpha$  (20, 25), factors that are also known to affect  
338 lipogenesis, cell proliferation and autophagy. Together with our earlier study, which established  
339 SIRT4 as a negative regulator of AMPK signalling (20), we now propose SIRT4 activity in the



340 mitochondria as a key determinant of the balance between cellular catabolic and anabolic pathways  
341 exerted via AMPK and TORC1. This is particularly evident by SIRT4-dependent change in the  
342 phosphorylation status of ULK1, a substrate of both AMPK and TORC1, in favour of TORC1  
343 mediated modification at Ser-757. It should be noted that phosphorylation at Ser-757 is known to  
344 abrogate AMPK dependent phosphorylation of ULK1, which is activatory (41). In addition to  
345 highlighting the role of SIRT4 in AMPK-TORC1 balance, it also provides mechanistic basis to the  
346 ability of SIRT4 to regulate autophagy.

347         Loss of SIRT4 has been established to reduce body fat and protect from high fat induced  
348 obesity (32). While others and we have shown that inhibiting fatty acid oxidation through  
349 AMPK/PGC1 $\alpha$ -SIRT1/PPAR $\alpha$  axis is responsible for this phenotype (20, 25), if/how SIRT4 affects  
350 lipogenesis has not been addressed, thus far. In this context, we have found that SIRT4-TORC1  
351 interplay regulates expression of lipogenic genes downstream to SREBP1 in primary hepatocytes  
352 and these are consistent with the lean phenotype observed in *SIRT4*<sup>-/-</sup> mice (32). Motivated by our  
353 findings, it will be exciting to perturb SIRT4 expression in lipogenic tissues and study its impact on  
354 organismal physiology, in the future.

355         One of the key highlights of our study is the unravelling of mTOR regulation by  
356 mitochondrial glutamine sparing. Although, glutamine deprivation studies indicated that it is a  
357 crucial upstream factor that is necessary to activate mTOR (17, 18), our findings clearly show that  
358 differential glutamine utilization, via the TCA, during fed and fasted states control TORC1  
359 signalling. Although, recent reports have indicated that  $\alpha$ -KG could impinge on mTOR and  
360 organismal lifespan (19),  $\alpha$ -KG has been shown to have both inhibitory and activatory effects on  
361 mTOR (18, 19). In this regard, we provide a physiologically relevant context to control of TORC1

362 by glutamine metabolism in the mitochondria. Notably, our results suggest that glutamine could be  
363 utilized as a metabolic signal to conditionally activate mTOR dependent anabolic pathways, which  
364 is dictated by the presence or absence of other nutrients that sustain cellular energetic needs.

365 Even while differential glutamine channelling into TCA affecting mTOR is rather intuitive,  
366 it becomes essential to identify a molecular factor that couples cellular energetics and glutamine  
367 metabolism. In this context, we have discovered that mitochondrial sirtuin SIRT4, whose role as a  
368 regulator of glutamine metabolism has been thoroughly established particularly in cancers (28),  
369 plays a pivotal role. We clearly demonstrate that presence or absence of SIRT4 affects glutamine  
370 metabolism via glutamate dehydrogenase and thus the differential channelling of glutamine into the  
371 TCA through  $\alpha$ -KG determines whether or not TORC1 should be induced. Thus, we provide  
372 conclusive mechanistic support to explain both glutamine sparing-mediated and SIRT4-dependent  
373 activation of TORC1. Moreover, based on our earlier study wherein we had identified SIRT4 to be a  
374 negative regulator of AMPK and the results described here, we show that SIRT4 controls TORC1  
375 via both AMPK and glutamine. This is interesting since glutamine utilization is intrinsically coupled  
376 to cellular energetics, as mentioned earlier (31). Therefore, it is likely that glutamine sparing and  
377 mitochondrial ATP production, which affects AMPK signalling, might synergistically bring about  
378 multiple dynamic states of mTOR/TORC1 activation.

379 Emerging literature indicates that both extent of TORC1 activation and differential  
380 phosphorylation of downstream substrates are crucial for encoding specificity (33, 35, 44). In this  
381 regard, it is interesting to note that SIRT4-mediated control of mTOR is limited to TORC1-  
382 dependent phosphorylation of S6K and ULK1 but not 4E-BP1. It should be noted that Kang et al  
383 reported that 4E-BP1, a high affinity substrate, is also resistant to TORC1 inhibition (33, 34),

384 analogous to our findings. Hence, it will be exciting to address, in the future, the differential control  
385 of mTOR-dependent processes by mitochondrial signals, and the impact on cellular growth and  
386 proliferation.

387 Our study also distinguishes the cross-talk between metabolic inputs, SIRT4 functions and  
388 cellular physiology. Consistent with the regulation of TORC1 signalling via glutamine sparing, we  
389 have found that it is indeed differential SIRT4 expression under low or high glucose conditions,  
390 which determines the ability of cells to mount TORC1 signalling. Specifically, it should be noted  
391 that absence of SIRT4 led to a drastic reduction in TORC1 signalling even under high glucose  
392 conditions and ectopic expression of SIRT4 under low glucose conditions mimicked GDH inhibited  
393 state vis-à-vis effects on TORC1. These are also supported by changes in autophagy as a function of  
394 SIRT4 expression both under high and low glucose conditions.

395 In conclusion, by identifying SIRT4 as a key determinant of TORC1 signalling, we have  
396 provided molecular and physiological basis for mitochondrial control of mTOR. Being the first  
397 report to describe the dependence of anabolic-signalling on SIRT4, we believe that this will  
398 motivate further studies in unravelling the need for a sirtuin to be induced during a nutrient rich  
399 state.

400

## 401 **Materials and Methods**

402 **Cell lines and primary hepatocyte culture:** HEK293, HEK293T and HepG2 cell lines were  
403 obtained from ATCC and were maintained in DMEM (Sigma Cat No #D7777) medium containing  
404 25mM glucose with 10% fetal bovine serum (FBS) (Gibco Cat. No #16000-044) unless otherwise

405 stated. HHL-17 cell line was a kind gift from Prof. Arvind Patel (MRC - University of Glasgow  
406 Centre for Virus Research).

407 Primary hepatocyte isolation: Primary hepatocytes were isolated from 3-4 months old male - wild  
408 type and *SIRT4* knockout (*SIRT4*<sup>-/-</sup>) mice (obtained from Jackson Laboratories, #012756),  
409 maintained under standard animal house conditions and fed with standard chow diet. Animals were  
410 sedated using thiopentone and perfused through the portal vein with HBSS solution followed by  
411 DMEM low glucose containing Collagenase A (340 µg/ml) (Sigma Aldrich Cat. no # C5138). The  
412 tissue was minced in this solution and passed through a 70µm strainer to obtain a single cell  
413 suspension. This suspension was then centrifuged at 50g, 4°C for 5 minutes. The pellet was washed  
414 twice and plated at desired density in DMEM high glucose with 10% FBS in Collagen Type I  
415 (Sigma Aldrich Cat. No# C3867) coated plates. Media was changed to serum free medium after 6  
416 hours of plating. All animal studies were performed using IAEC approved protocols.

417 **Plasmids and constructs:** Human SIRT4 cDNA was cloned into pBabe-puro. pLKO.1-eGFP  
418 scrambled shRNA was a gift from Sorab Dalal (ACTREC, India). pLKO.1 Sirt4 shRNA  
419 (TRC0000018948) was purchased from Sigma Aldrich. SIRT4 was cloned into pAdtrack CMV  
420 plasmid, which was a gift from Bert Vogelstein (Addgene plasmid # 16405).

421 **Adenoviral and lentiviral preparation:** SIRT4 was cloned into pAdtrack CMV plasmid and  
422 adenovirus was prepared as per the protocol described by Luo et al., 2007 (45). Cells were collected  
423 post expression of GFP and were lysed using hypotonic buffer [HEPES (100mM, pH 7.5), MgCl<sub>2</sub>  
424 (1.5mM), KCl (10mM), DTT (0.5mM)]. Supernatant was collected and used for transduction in  
425 different cell types. SIRT4 expression was confirmed by RT-PCR/-qPCR.

426 For lentiviral preparation, pLKO.1 scrambled shRNA or *Sirt4* shRNA was transfected in

427 HEK293T cells with packaging plasmids pMD2.G (Addgene plasmid # 12259) and psPAX2  
428 (Addgene plasmid # 12260), which were a gift from Didier Trono. Media was collected at 36 hours  
429 and 48 hours post transfection, filtered using 0.45 $\mu$ m filters and stored at -80°C until use.

430 **Transfection and Transductions:** Cells were transfected with plasmids as indicated using  
431 Lipofectamine 2000 (Invitrogen Cat no # 11668019) according to manufacturer's instructions.  
432 Adenoviral particles were used for transducing cell lines after 12 hours of plating; cells were  
433 collected 36 hours post transduction after respective treatments. Primary hepatocyte cultures were  
434 transduced with adenovirus after 24 hours of plating and collected at 72 hours post plating after  
435 respective treatments. Lentiviral particles were used for knockdown in cells after 24 hours of  
436 plating, in the presence of polybrene (Sigma Aldrich Cat # H9268) at a concentration of 8 $\mu$ g/ml.  
437 Cells were collected 48 hours post transduction.

438 **Treatments:** All treatments were given in FBS containing media unless otherwise specified. For  
439 GDH inhibition experiments, Epigallocatechin gallate (EGCG, Sigma Aldrich Cat. No# E4143) was  
440 used at a concentration of 100 $\mu$ M for 1 hour in low (5mM) glucose media. For GLS inhibition  
441 experiments, Bis-2-(5-phenylacetamido-1,3,4-thiadiazol-2-yl)ethyl sulfide (BPTES, Sigma Aldrich  
442 Cat. No# SML0601) was used at a concentration of 20 $\mu$ M for 1 hour in low (5mM) glucose media.  
443 For experiments under low/high glucose, cells were either shifted to 5mM glucose containing media  
444 (Low) (Sigma Cat No #D5523) or fresh 25mM glucose containing media (High), 12 hours prior to  
445 collection. For TOR inhibition, cells were treated with 20 nM Rapamycin (Sigma Cat No# 0395) for  
446 30 minutes under low glucose conditions. For amino acid and growth factor starvation, cells were  
447 kept in 5mM glucose containing DMEM medium for 3 hours followed by 1 hour in serum free  
448 EBSS (Cat. No # E2888, Sigma) prior to collection. For glutamine supplementation experiments,

449 cells were kept in 2mM glutamine supplemented in 5mM glucose or 25mM glucose containing  
450 DMEM medium (as indicated in figure) for 1 hour. For GDH assay, cells were cultured in 5mM  
451 glucose containing DMEM medium. For inhibition of autophagy flux, cells were kept in either low  
452 (5mM) or high (25mM) glucose media with or without 100 $\mu$ M Leupeptin (Sigma Cat No# L2884)  
453 for 12 hours. For qPCR and luciferase assays, cells were kept in the indicated media conditions for 6  
454 hours.

455 **Western blotting:** Cells were lysed with RIPA lysis buffer [Tris(50mM, pH8), Sodium chloride  
456 (150mM), SDS (0.1%), sodium deoxycholate (0.5%), triton X-100 (1%), 1mM sucrose]]  
457 supplemented with a protease inhibitor cocktail (Roche, Catalog No: 04693159001), phosphatase  
458 inhibitor PhosSTOP (Roche, Catalog No: 000000010837091001) and 1mM PMSF (Sigma). The  
459 lysates were centrifuged at 12,000 rpm (4°C) for 10 minutes to remove cell debris. The  
460 concentration of protein was measured using the BCA Protein Assay kit (Thermo Fisher Scientific  
461 Cat. No# 23225). Subsequently, equal amounts of protein (in 1X Laemmli loading buffer) were  
462 resolved using SDS-PAGE gels and transferred to PVDF membranes (Millipore Cat. No#  
463 IPVH00010). After blocking in 5% BSA or 5% fat-free milk in TBST (TBS with 0.1% Tween-20)  
464 for 1 hour at RT, membranes were incubated with primary antibody at 4°C overnight. To visualize  
465 the bands, blots were incubated with HRP conjugated secondary antibodies in 5% fat-free milk in  
466 TBST for 1 hour at RT followed by washes in TBST. Next, the membranes were visualized using  
467 the GE AI600 chemiluminescence system with ECL reagent from Thermo Scientific (Cat.  
468 No#1859023/185022).

469 **Immunofluorescence:** After respective treatments and at indicated time points, primary hepatocytes  
470 plated on collagen coated cover slips, were treated with 75nM LysoTracker™ Deep Red (Thermo

471 Fisher Scientific Cat. No# L12492) for 15 minutes in the same media. Cells were then rinsed once  
472 with PBS and fixed in chilled 4% PFA for 30 minutes. After fixation, the cells were washed thrice  
473 with PBST (PBS with 0.1% Tween-20). After blocking and permeabilization in 5% BSA and 0.5%  
474 Triton X in PBST for 40 minutes, cells were incubated overnight at 4°C, with mTOR antibody (Cat.  
475 No# 2983). Cells were then incubated with anti-rabbit Alexa Fluor 647 (Thermo Fisher Scientific  
476 Cat. No# L12492) for 1 hour at RT followed by washes in PBST. Coverslips were then mounted on  
477 a slide and imaged at 40X using FluoView® FV1200 Laser Scanning Confocal Microscope from  
478 Olympus Life Science.

479 **Oil Red O staining:** Primary hepatocytes plated in collagen coated plates, after respective  
480 treatments, were rinsed once with PBS and fixed in chilled 4% PFA for 30 minutes. The cells were  
481 rinsed once again in PBS and freshly prepared and filtered Oil Red O solution (40% in distilled  
482 water from a 0.5% stock solution in isopropanol) was added and kept for 15 minutes. The cells were  
483 washed in distilled water. The cells were then kept in water and imaged on EVOS FLc microscope  
484 from Life technologies Inc.

485 **Antibodies:** The following antibodies were used for Western blot analyses. Anti-phospho S6K (Thr  
486 389) (Cat. No# 9234S), anti-p70-S6K (Cat. No# 2708S), anti-phospho ULK1 (Ser757) (Cat. no#  
487 6888S), anti-ULK1 (Cat. No# 8054S), anti-phospho 4E-BP1 (Cat. no# 9456S), anti-4E-BP1 (Cat.  
488 no# 9644S) and anti-LC3A/B (Cat. No# 12741S) were obtained from Cell Signaling Technologies  
489 (USA). Anti- $\beta$ -Actin (Cat. No # A1978), anti-HA tag (Cat. No# H6908, Sigma), anti-Rabbit  
490 secondary (Cat. No# A0545) and anti-mouse secondary (Cat. No# A9044) antibodies were obtained  
491 from Sigma Aldrich (USA).

492 **RNA isolation and quantitation:** Total RNA was extracted using the Trizol reagent (Cat. No#

493 15596018) according to the manufacturer's instructions. 1 $\mu$ g of RNA was reverse transcribed into  
494 cDNA using random hexamers and SuperScript IV reverse transcriptase kit (Cat. No# 18090200).  
495 PCR was carried out with KAPA SYBR® FAST Universal 2X qPCR Master Mix (Cat# KK4601) /  
496 LightCycler 480 SYBR Green I Master kit (Roche Cat# 14712220) in Vapo.Protect Eppendorf LC-  
497 480 and LC-96 from Roche system using primer pairs mentioned in Supplementary Table A.

498  **$\alpha$ -Ketoglutarate ( $\alpha$ -KG) assay and Glutamate dehydrogenase (GDH) assay:**  $\alpha$ -KG levels and  
499 GDH activity were assayed in cell lysates using  $\alpha$ -KG measurement kit (Cat. No# ab83431) and  
500 GDH activity kit (Cat. No# ab102527) from Abcam as per manufacturer's instructions. Briefly, cells  
501 were lysed using assay buffer provided in the kit and centrifuged at 13000 rpm for 3-5 minutes at  
502 4°C. For  $\alpha$ -KG, lysates were further deproteinized using perchloric acid and then processed as per  
503 manufacturer's instructions. Both assays were set up in 96-well plates and colorimetric readings  
504 taken using Tecan Infinite M200 pro plate reader system at 570 nm for  $\alpha$ -KG and 450nm for GDH.  
505  $\alpha$ -KG levels and GDH activity were normalized to protein concentration (estimated using BCA:  
506 Pierce, Thermofischer Cat no# 23225).

507 **Luciferase assay:** HepG2 cells were transfected with the luciferase expression construct under the  
508 Fatty Acid Synthetase (FAS) Promoter (Addgene# 8890) along with  $\beta$ -Gal plasmid (Ambion Cat.  
509 No# 5791). After 12 hours of transfection, cells were transduced with either Ad-CMV or Ad-SIRT4  
510 for another 24 hours, following which the cells were kept for 6 hours in either low (5mM) or high  
511 (25mM) glucose. Cells were then harvested and lysed in passive lysis buffer (Promega Cat. No#  
512 E1941).  $\beta$ -galactosidase assay was performed using ONPG (orthoNitrophenyl- $\beta$ -galactoside, Sigma  
513 Cat. No# N1127) as a substrate. Luciferase assay was performed with the Luciferase assay system  
514 (Promega Cat. No# E1500) as per manufacturer's instructions. Luminescence counts were measured



515 in Infinite-M200-Pro (Tecan) or TriStarLB941 (Berthold technologies) and normalized to the  $\beta$ -  
516 galactosidase values to determine relative luciferase units (RLU).

517 **Data processing and statistical analysis:** Western blots and immunofluorescence data were  
518 analysed using ImageJ software. Student's T-test and ANOVA were used for statistical analysis (p  
519 value: \* < 0.05; \*\* < 0.01; \*\*\* < 0.001 or as indicated). Microsoft Excel was used for data  
520 processing, and statistical significance was calculated using Excel or GraphPad Prism 5.0. Results  
521 are given as the means  $\pm$  standard deviation or as indicated. All experiments were performed at least  
522 twice with a minimum of 3-6 replicates.

523

#### 524 **Acknowledgements**

525 We thank Prof. Arvind Patel (MRC - University of Glasgow Centre for Virus Research) for  
526 gifting us HHL-17 cells. We thank Dr Sorab Dalal for gifting us the pLKO.1 eGFP vector. We thank  
527 Dr. Kalidas Kohale and Dr. Shital Suryavanshi (TIFR-AH) and Dr. Sachin, Dr. Sagar Tarte and Ms.  
528 Ritika Gupta (National Facility for Gene Function in Health and Disease, IISER Pune) for help with  
529 the animal experiments. We thank Himani Narang, G. Abhinav and Abhrajyoti Chakrabarti for their  
530 help with the proliferation assays.

531

#### 532 **Funding information**

533 This study was supported by funds to U.K. from DAE/TIFR (Govt. of India. Grant number 12P-  
534 0122) and Swarnajayanti fellowship (DST Govt. of India. Grant number DST/SJF/LSA-02/2012-  
535 13).

536

537 **Conflict of interest**

538 The authors declare that they have no conflict of interest.

539

540 **Author contributions**

541 UK designed and supervised the research; ES, MT, NM and AA performed the research; and  
542 UK, ES, and MT analysed the data and wrote the manuscript.

543

544 **References**

- 545 1. Efeyan A, Zoncu R, Sabatini DM. 2012. Amino acids and mTORC1: from lysosomes to  
546 disease. *Trends Mol Med* 18:524-33.
- 547 2. Dibble CC, Manning BD. 2013. Signal integration by mTORC1 coordinates nutrient input  
548 with biosynthetic output. *Nat Cell Biol* 15:555-64.
- 549 3. Houtkooper RH, Pirinen E, Auwerx J. 2012. Sirtuins as regulators of metabolism and  
550 healthspan. *Nat Rev Mol Cell Biol* 13:225-238.
- 551 4. Haigis MC, Sinclair DA. 2010. Mammalian sirtuins: biological insights and disease  
552 relevance. *Annu Rev Pathol* 5:253-95.
- 553 5. Bheda P, Jing H, Wolberger C, Lin H. 2016. The Substrate Specificity of Sirtuins. *Annu Rev*  
554 *Biochem* 85:405-29.
- 555 6. Price NL, Gomes AP, Ling AJ, Duarte FV, Martin-Montalvo A, North BJ, Agarwal B, Ye L,  
556 Ramadori G, Teodoro JS, Hubbard BP, Varela AT, Davis JG, Varamini B, Hafner A,  
557 Moaddel R, Rolo AP, Coppari R, Palmeira CM, de Cabo R, Baur JA, Sinclair DA. 2012.

- 558 SIRT1 is required for AMPK activation and the beneficial effects of resveratrol on  
559 mitochondrial function. *Cell Metab* 15:675-90.
- 560 7. Canto C, Jiang LQ, Deshmukh AS, Matakı C, Coste A, Lagouge M, Zierath JR, Auwerx J.  
561 2010. Interdependence of AMPK and SIRT1 for metabolic adaptation to fasting and  
562 exercise in skeletal muscle. *Cell Metab* 11:213-9.
- 563 8. Canto C, Gerhart-Hines Z, Feige JN, Lagouge M, Noriega L, Milne JC, Elliott PJ, Puigserver  
564 P, Auwerx J. 2009. AMPK regulates energy expenditure by modulating NAD<sup>+</sup> metabolism  
565 and SIRT1 activity. *Nature* 458:1056-60.
- 566 9. Ruderman NB, Xu XJ, Nelson L, Cacicedo JM, Saha AK, Lan F, Ido Y. 2010. AMPK and  
567 SIRT1: a long-standing partnership? *Am J Physiol Endocrinol Metab* 298:E751-60.
- 568 10. Inoki K, Kim J, Guan KL. 2012. AMPK and mTOR in cellular energy homeostasis and drug  
569 targets. *Annu Rev Pharmacol Toxicol* 52:381-400.
- 570 11. Alers S, Loffler AS, Wesselborg S, Stork B. 2012. Role of AMPK-mTOR-Ulk1/2 in the  
571 regulation of autophagy: cross talk, shortcuts, and feedbacks. *Mol Cell Biol* 32:2-11.
- 572 12. Ghosh HS, McBurney M, Robbins PD. 2010. SIRT1 negatively regulates the mammalian  
573 target of rapamycin. *PLoS One* 5:e9199.
- 574 13. Igarashi M, Guarente L. 2016. mTORC1 and SIRT1 Cooperate to Foster Expansion of Gut  
575 Adult Stem Cells during Calorie Restriction. *Cell* 166:436-450.
- 576 14. Hong S, Zhao B, Lombard DB, Fingar DC, Inoki K. 2014. Cross-talk between sirtuin and  
577 mammalian target of rapamycin complex 1 (mTORC1) signaling in the regulation of S6  
578 kinase 1 (S6K1) phosphorylation. *J Biol Chem* 289:13132-41.
- 579 15. Hensley CT, Wasti AT, DeBerardinis RJ. 2013. Glutamine and cancer: cell biology,  
580 physiology, and clinical opportunities. *J Clin Invest* 123:3678-84.
- 581 16. Zhang J, Pavlova NN, Thompson CB. 2017. Cancer cell metabolism: the essential role of  
582 the nonessential amino acid, glutamine. *Embo j* 36:1302-1315.

- 583 17. Jewell JL, Kim YC, Russell RC, Yu FX, Park HW, Plouffe SW, Tagliabracci VS, Guan KL.  
584 2015. Metabolism. Differential regulation of mTORC1 by leucine and glutamine. *Science*  
585 347:194-8.
- 586 18. Duran RV, Oppliger W, Robitaille AM, Heiserich L, Skendaj R, Gottlieb E, Hall MN. 2012.  
587 Glutaminolysis activates Rag-mTORC1 signaling. *Mol Cell* 47:349-58.
- 588 19. Chin RM, Fu X, Pai MY, Vergnes L, Hwang H, Deng G, Diep S, Lomenick B, Meli VS,  
589 Monsalve GC, Hu E, Whelan SA, Wang JX, Jung G, Solis GM, Fazlollahi F, Kaweeteerawat  
590 C, Quach A, Nili M, Krall AS, Godwin HA, Chang HR, Faull KF, Guo F, Jiang M, Trauger  
591 SA, Saghatelian A, Braas D, Christofk HR, Clarke CF, Teitell MA, Petrascheck M, Reue K,  
592 Jung ME, Frand AR, Huang J. 2014. The metabolite alpha-ketoglutarate extends lifespan by  
593 inhibiting ATP synthase and TOR. *Nature* 510:397-401.
- 594 20. Ho L, Titus AS, Banerjee KK, George S, Lin W, Deota S, Saha AK, Nakamura K, Gut P,  
595 Verdin E, Kolthur-Seetharam U. 2013. SIRT4 regulates ATP homeostasis and mediates a  
596 retrograde signaling via AMPK. *Aging (Albany NY)* 5:835-49.
- 597 21. Ahuja N, Schwer B, Carobbio S, Waltregny D, North BJ, Castronovo V, Maechler P, Verdin  
598 E. 2007. Regulation of insulin secretion by SIRT4, a mitochondrial ADP-ribosyltransferase. *J*  
599 *Biol Chem* 282:33583-92.
- 600 22. Haigis MC, Mostoslavsky R, Haigis KM, Fahie K, Christodoulou DC, Murphy AJ, Valenzuela  
601 DM, Yancopoulos GD, Karow M, Blander G, Wolberger C, Prolla TA, Weindruch R, Alt FW,  
602 Guarente L. 2006. SIRT4 inhibits glutamate dehydrogenase and opposes the effects of  
603 calorie restriction in pancreatic beta cells. *Cell* 126:941-54.
- 604 23. Feldman JL, Baeza J, Denu JM. 2013. Activation of the protein deacetylase SIRT6 by long-  
605 chain fatty acids and widespread deacylation by mammalian sirtuins. *J Biol Chem*  
606 288:31350-6.

- 607 24. Anderson KA, Huynh FK, Fisher-Wellman K, Stuart JD, Peterson BS, Douros JD, Wagner  
608 GR, Thompson JW, Madsen AS, Green MF, Sivley RM, Ilkayeva OR, Stevens RD, Backos  
609 DS, Capra JA, Olsen CA, Campbell JE, Muoio DM, Grimsrud PA, Hirschey MD. 2017.  
610 SIRT4 Is a Lysine Deacylase that Controls Leucine Metabolism and Insulin Secretion. *Cell*  
611 *Metab* 25:838-855.e15.
- 612 25. Nasrin N, Wu X, Fortier E, Feng Y, Bare OC, Chen S, Ren X, Wu Z, Streeper RS, Bordone  
613 L. 2010. SIRT4 regulates fatty acid oxidation and mitochondrial gene expression in liver and  
614 muscle cells. *J Biol Chem* 285:31995-2002.
- 615 26. Komlos D, Mann KD, Zhuo Y, Ricupero CL, Hart RP, Liu AY, Firestein BL. 2013. Glutamate  
616 dehydrogenase 1 and SIRT4 regulate glial development. *Glia* 61:394-408.
- 617 27. Fernandez-Marcos PJ, Serrano M. 2013. Sirt4: the glutamine gatekeeper. *Cancer Cell*  
618 23:427-8.
- 619 28. Jeong SM, Xiao C, Finley LW, Lahusen T, Souza AL, Pierce K, Li YH, Wang X, Laurent G,  
620 German NJ, Xu X, Li C, Wang RH, Lee J, Csibi A, Cerione R, Blenis J, Clish CB,  
621 Kimmelman A, Deng CX, Haigis MC. 2013. SIRT4 has tumor-suppressive activity and  
622 regulates the cellular metabolic response to DNA damage by inhibiting mitochondrial  
623 glutamine metabolism. *Cancer Cell* 23:450-63.
- 624 29. Csibi A, Fendt SM, Li C, Poulogiannis G, Choo AY, Chapski DJ, Jeong SM, Dempsey JM,  
625 Parkhitko A, Morrison T, Henske EP, Haigis MC, Cantley LC, Stephanopoulos G, Yu J,  
626 Blenis J. 2013. The mTORC1 pathway stimulates glutamine metabolism and cell  
627 proliferation by repressing SIRT4. *Cell* 153:840-54.
- 628 30. Nofal M, Zhang K, Han S, Rabinowitz JD. 2017. mTOR Inhibition Restores Amino Acid  
629 Balance in Cells Dependent on Catabolism of Extracellular Protein. *Mol Cell* 67:936-946.e5.

- 630 31. Karaca M, Martin-Levilain J, Grimaldi M, Li L, Dizin E, Emre Y, Maechler P. 2018. Liver  
631 Glutamate Dehydrogenase Controls Whole-Body Energy Partitioning Through Amino Acid-  
632 Derived Gluconeogenesis and Ammonia Homeostasis. *Diabetes* 67:1949-1961.
- 633 32. Laurent G, German NJ, Saha AK, de Boer VC, Davies M, Koves TR, Dephoure N, Fischer  
634 F, Boanca G, Vaitheesvaran B, Lovitch SB, Sharpe AH, Kurland IJ, Steegborn C, Gygi SP,  
635 Muoio DM, Ruderman NB, Haigis MC. 2013. SIRT4 coordinates the balance between lipid  
636 synthesis and catabolism by repressing malonyl CoA decarboxylase. *Mol Cell* 50:686-98.
- 637 33. Kang SA, Pacold ME, Cervantes CL, Lim D, Lou HJ, Ottina K, Gray NS, Turk BE, Yaffe MB,  
638 Sabatini DM. 2013. mTORC1 phosphorylation sites encode their sensitivity to starvation and  
639 rapamycin. *Science* 341:1236566.
- 640 34. Choo AY, Blenis J. 2009. Not all substrates are treated equally: implications for mTOR,  
641 rapamycin-resistance and cancer therapy. *Cell Cycle* 8:567-72.
- 642 35. Choo AY, Yoon SO, Kim SG, Roux PP, Blenis J. 2008. Rapamycin differentially inhibits  
643 S6Ks and 4E-BP1 to mediate cell-type-specific repression of mRNA translation. *Proc Natl*  
644 *Acad Sci U S A* 105:17414-9.
- 645 36. Zhu Y, Yan Y, Principe DR, Zou X, Vassilopoulos A, Gius D. 2014. SIRT3 and SIRT4 are  
646 mitochondrial tumor suppressor proteins that connect mitochondrial metabolism and  
647 carcinogenesis. *Cancer Metab* 2:15.
- 648 37. Shaw RJ. 2009. LKB1 and AMP-activated protein kinase control of mTOR signalling and  
649 growth. *Acta Physiol (Oxf)* 196:65-80.
- 650 38. Sancak Y, Bar-Peled L, Zoncu R, Markhard AL, Nada S, Sabatini DM. 2010. Ragulator-Rag  
651 complex targets mTORC1 to the lysosomal surface and is necessary for its activation by  
652 amino acids. *Cell* 141:290-303.
- 653 39. Horton JD, Goldstein JL, Brown MS. 2002. SREBPs: activators of the complete program of  
654 cholesterol and fatty acid synthesis in the liver. *J Clin Invest* 109:1125-31.

- 655 40. Haspel J, Shaik RS, Ifedigbo E, Nakahira K, Dolinay T, Englert JA, Choi AM. 2011.  
656 Characterization of macroautophagic flux in vivo using a leupeptin-based assay. *Autophagy*  
657 7:629-42.
- 658 41. Kim J, Kundu M, Viollet B, Guan KL. 2011. AMPK and mTOR regulate autophagy through  
659 direct phosphorylation of Ulk1. *Nat Cell Biol* 13:132-41.
- 660 42. Hindupur SK, Gonzalez A, Hall MN. 2015. The opposing actions of target of rapamycin and  
661 AMP-activated protein kinase in cell growth control. *Cold Spring Harb Perspect Biol*  
662 7:a019141.
- 663 43. Parhofer KG. 2015. Interaction between Glucose and Lipid Metabolism: More than Diabetic  
664 Dyslipidemia. *Diabetes Metab J* 39:353-62.
- 665 44. Mukhopadhyay S, Frias MA, Chatterjee A, Yellen P, Foster DA. 2016. The Enigma of  
666 Rapamycin Dosage. *Mol Cancer Ther* 15:347-53.
- 667 45. Luo J, Deng ZL, Luo X, Tang N, Song WX, Chen J, Sharff KA, Luu HH, Haydon RC, Kinzler  
668 KW, Vogelstein B, He TC. 2007. A protocol for rapid generation of recombinant  
669 adenoviruses using the AdEasy system. *Nat Protoc* 2:1236-47.
- 670
- 671

672 **Figure legends**

673 **Figure 1: Mitochondrial SIRT4 activates cytosolic TORC1**

674 **(A-E)** Immunoblots and quantitations for pS6K(Thr389)/S6K in **(A)** primary hepatocytes derived  
675 from wildtype mice, pre-incubated in EBSS for 3 hours, followed by 1 hour incubation in low (5mM  
676 Glc) and high (25mM Glc) containing EBSS with or without either 2mM glutamine or 0.8mM  
677 Leucine/Isoleucine (n=4); **(B)** primary hepatocytes derived from wildtype mice, under low (5mM  
678 Glc) and high (25mM Glc) glucose conditions with or without 2mM glutamine (Gln) (n=5); **(C)**  
679 primary hepatocytes from wild type mice treated with 100 $\mu$ M EGCG (GDHi) for 1 hour under 5mM  
680 glucose (n=4); **(D)** primary hepatocytes from wildtype mice treated with 20 $\mu$ M BPTES (GLSi) for 1  
681 hour under 5mM glucose (n=4); **(E)** primary hepatocytes from wild type mice adenovirally  
682 transduced with Ad-CMV (control) and Ad SIRT4 (SIRT4) under low glucose conditions (n=6); **(F)**  
683 Representative immunoblots for pAkt (Ser473), pAkt (Thr308), Akt and actin in HEK293T cells  
684 overexpressing control or SIRT4 (SIRT4-HA) under low glucose media (n=4); **(G)** Representative  
685 immunoblots for pS6K (Thr389)/S6K in primary hepatocytes adenovirally transduced with either  
686 control or SIRT4 and incubated in low glucose media with or without 20nM Rapamycin **(H)**  
687 primary hepatocytes isolated from wild type and SIRT4-KO mice. SIRT4 expression was restored  
688 by transducing Ad-SIRT4 into SIRT4-KO hepatocytes (SIRT4res) to rescue mTORC1 signaling  
689 (n=6); **(I)** Relative contributions of glucose (Glc) and glutamine (Gln) to the TCA cycle and  
690 mTORC1 activation under fed versus fasted states. pyr: pyruvate; GDH: glutamate dehydrogenase;  
691 TCA: tricarboxylic acid cycle; Data is represented as means  $\pm$  SD (\*p<0.05, \*\*\*p<0.001,  
692 #p<0.0001).



693 **Figure 2: Sirt4 exerts control over nutrient and growth factor dependent activation of**  
694 **mTORC1**

695 **(A)** Immunoblots and quantitations for pS6K/S6K and Actin, as indicated, in **(A)** primary  
696 hepatocytes from wild type mice transduced with Ad-CMV (control) and Ad-SIRT4 (SIRT4), and  
697 cultured in low (5 mM) and high (25mM) glucose medium for 12 hours (n=5); **(B)** Primary  
698 hepatocytes isolated from SIRT4-KO mice. SIRT4 expression was restored by transducing Ad-  
699 SIRT4 (SIRT4) into SIRT4-KO hepatocytes (SIRT4res), and cultured in low (5 mM) and high  
700 (25mM) glucose medium for 12 hours, as depicted (n=6); **(C)** Immunoblots for pS6K/S6K and  
701 Actin, as indicated, in control and SIRT4 transfected HEK293T cells pre-treated with low (5mM)  
702 glucose media for 3 hours (+AA/GFs) followed by 1 hour-EBSS treatment for serum and amino acid  
703 deprivation (-AA/GF) (n=6). **(D)** Schematic representation of the role of SIRT4 in regulating  
704 nutrient dependent activation of mTORC1. Presence of SIRT4, even under low glucose states  
705 activates mTORC1 while knockdown under high glucose states leads to attenuated mTORC1. Data  
706 is represented as means  $\pm$  SD (\*\*p<0.005, \*\*\*p<0.001, #p<0.0001).

707 **Figure 3: SIRT4-dependent glutamine sparing mediates TORC1 activation**

708 **(A-B)** Representative immunoblots for pS6K/S6K and actin in primary hepatocytes derived from  
709 wildtype mice were adenovirally transduced with control or SIRT4 and incubated in low (5mM)  
710 glucose containing media supplemented with or without 2mM glutamine and **(A)** 100uM EGCG or  
711 **(B)** 20uM BPTES, as indicated **(C)** Relative  $\alpha$ -Ketoglutarate levels in control (Ctrl) and SIRT4  
712 transfected (SIRT4) HEK293T cells (n=3); and quantitations for pS6K/S6K in control (Ctrl) and  
713 SIRT4 transfected (SIRT4) HEK293T cells (n=4) incubated in 5mM glucose containing media  
714 supplemented with or without 2mM glutamine; **(D-E)** Immunoblots and quantitations for pS6K/S6K

715 and actin in primary hepatocytes derived from **(D)** wildtype (n=5) and **(E)** SIRT4-KO mice (n=6),  
716 and adenovirally transduced with Ad-CMV (Ctrl) or Ad-SIRT4 (SIRT4/SIRT4res); All experiments  
717 with glutamine were done at 2mM glutamine (2mM Gln) given in 5mM glucose media for 1 hour.  
718 **(F)** Relative Glutamate dehydrogenase (GDH) activity in primary hepatocytes isolated from  
719 wildtype and SIRT4-KO mice. SIRT4 expression was restored by transducing Ad-SIRT4 in SIRT4-  
720 KO hepatocytes (SIRT4res) (n=3); **(G-H)** Representative immunoblots for **(G)** pS6K/S6K and **(H)**  
721 pAMPK/AMPK in primary hepatocytes transduced with Ad-CMV (Ctrl) or Ad-SIRT4 (SIRT4) and  
722 incubated in 5mM glucose media with/without 2mM glutamine and/or 0.5mM AICAR for 1 hour  
723 (n=4); **(I)** Schematic representation of a change in anaplerotic flux driven by SIRT4, leading to  
724 mTORC1 activation even under a fasted state. SIRT4 expression, leads to increased ATP levels in  
725 the cell which lead to reduced AMPK activation and further de-repression of mTORC1 activity;  
726 Data is represented as means  $\pm$  SD (\*\*p<0.005, \*\*\*p<0.001).

#### 727 **Figure 4: Sirt4 regulates mTORC1 localization to the lysosomes**

728 **(A-C)** Immunofluorescence images and quantitation of mTOR puncta (green) localised to lysosomes  
729 (red) in primary hepatocytes derived from wildtype and SIRT4<sup>-/-</sup> (SIRT4KO) mice, adenovirally  
730 transduced with Ad-CMV (Ctrl) or Ad-SIRT4 (SIRT4res), treated with 2mM glutamine under low  
731 glucose (5mM) conditions for 1 hour. Scale bar represents 40X magnification. Data is represented as  
732 means  $\pm$  SEM. (\*p<0.05, \*\*\*p<0.001).

#### 733 **Figure 5: Sirt4-TOR axis impinges on transcription via SREBP1 activation**

734 **(A)** FAS promoter driven luciferase assay in HepG2 cells over expressing SIRT4 in 5mM and  
735 25mM glucose media conditions (n=6); **(B)** Quantitative RT-PCR of genes involved in lipogenesis  
736 and fatty acid uptake (SREBP1, FASN, SCD1 and CD36) from primary hepatocytes isolated from

737 wildtype (Ctrl), SIRT4<sup>-/-</sup> (SIRT4KO) and Ad-SIRT4 transduced SIRT4KO (SIRT4res) (n=4-6); (C-  
738 D) Quantitative RT-PCR of FASN in primary hepatocytes derived from (C) wildtype and (D)  
739 SIRT4<sup>-/-</sup> mice, adenovirally transduced with either Ad-CMV (Ctrl/SIRT4KO) or Ad-SIRT4  
740 (SIRT4/SIRT4res) and treated with 2mM glutamine in low (5mM) glucose media for 6 hours (n=5-  
741 6). (E-F) Representative immunoblots and quantitations for LC3-II/LC3-I, and actin in HEK293T  
742 cells, transfected with (E) control and SIRT4 over expression vectors, kept in low (5mM) glucose  
743 media or (F) control and SIRT4 knock down vectors, and kept in high (25mM) glucose media; (G-  
744 H) Representative immunoblots and quantitations for LC3-II/actin in (G) control transfected or (H)  
745 SIRT4 over expressing HEK293T cells maintained in low (5mM) glucose media, with or without  
746 100uM leupeptin treatment for 12 hours; (I-J) Representative immunoblots and quantitations for  
747 LC3-II/actin in (I) control knock down or (J) SIRT4 knockdown HEK293T cells maintained in high  
748 (25mM) glucose media, with or without 100uM leupeptin treatment for 12 hours; (K-L)  
749 Proliferation assay showing the number of cells in (K) HEK293T cells transiently transfected with  
750 control and SIRT4-HA and (L) control and Sirt4 knock down (Sirt4KD) HEK293T cells at different  
751 time points after plating. (M) Schematic representation of SIRT4-mediated control of lipogenesis  
752 and autophagy via mTORC1-SREBP1 and mTORC1-ULK1 axis respectively; Statistical  
753 significance was calculated using student's *t-test* and ANOVA: \*  $p < 0.05$ , \*\*  $p < 0.01$ , \*\*\*  $p <$   
754  $0.001$ . Error bars indicate mean values  $\pm$  SEM.

755 **Figure 6: Schematic representation of mitochondrial regulation of nutrient dependent TORC1**  
756 **signalling by SIRT4**

757 SIRT4 modulates mitochondrial utilization of glutamine, which impinges on mTORC1 activation  
758 under a fasted to fed transition. Under fed states, inhibition of anaplerotic flux (via inhibition of

759 GDH) by SIRT4, leads to spared glutamine in the cytosol, which then activates mTORC1. Under  
760 fasted states, when SIRT4 is low, increased GDH activation leads to conversion of glutamine to  $\alpha$ -  
761 KG and hence inhibition of mTORC1 activity.

762

763

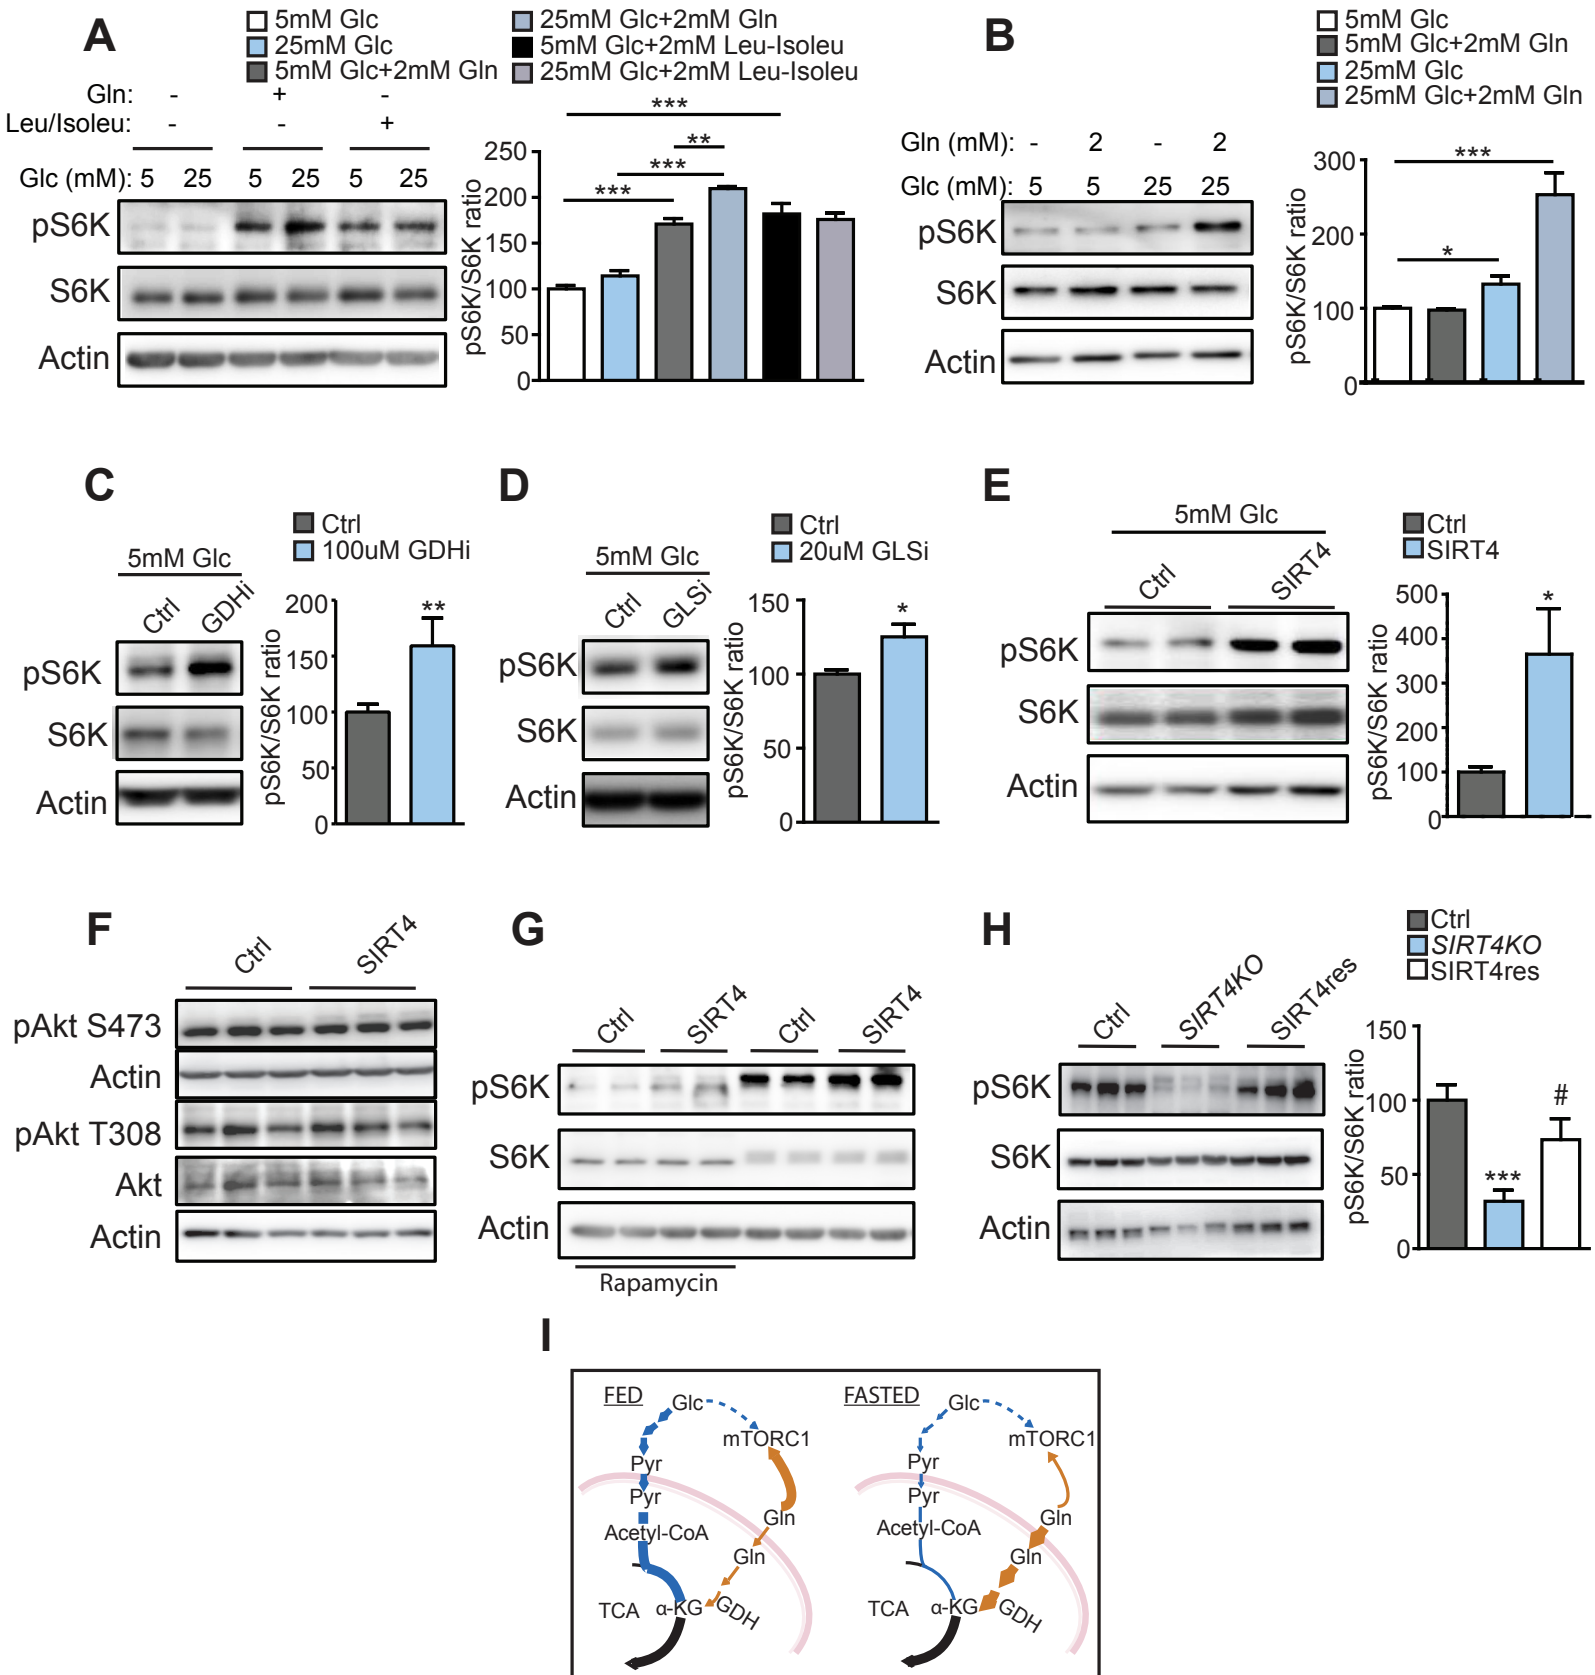

FIGURE 1

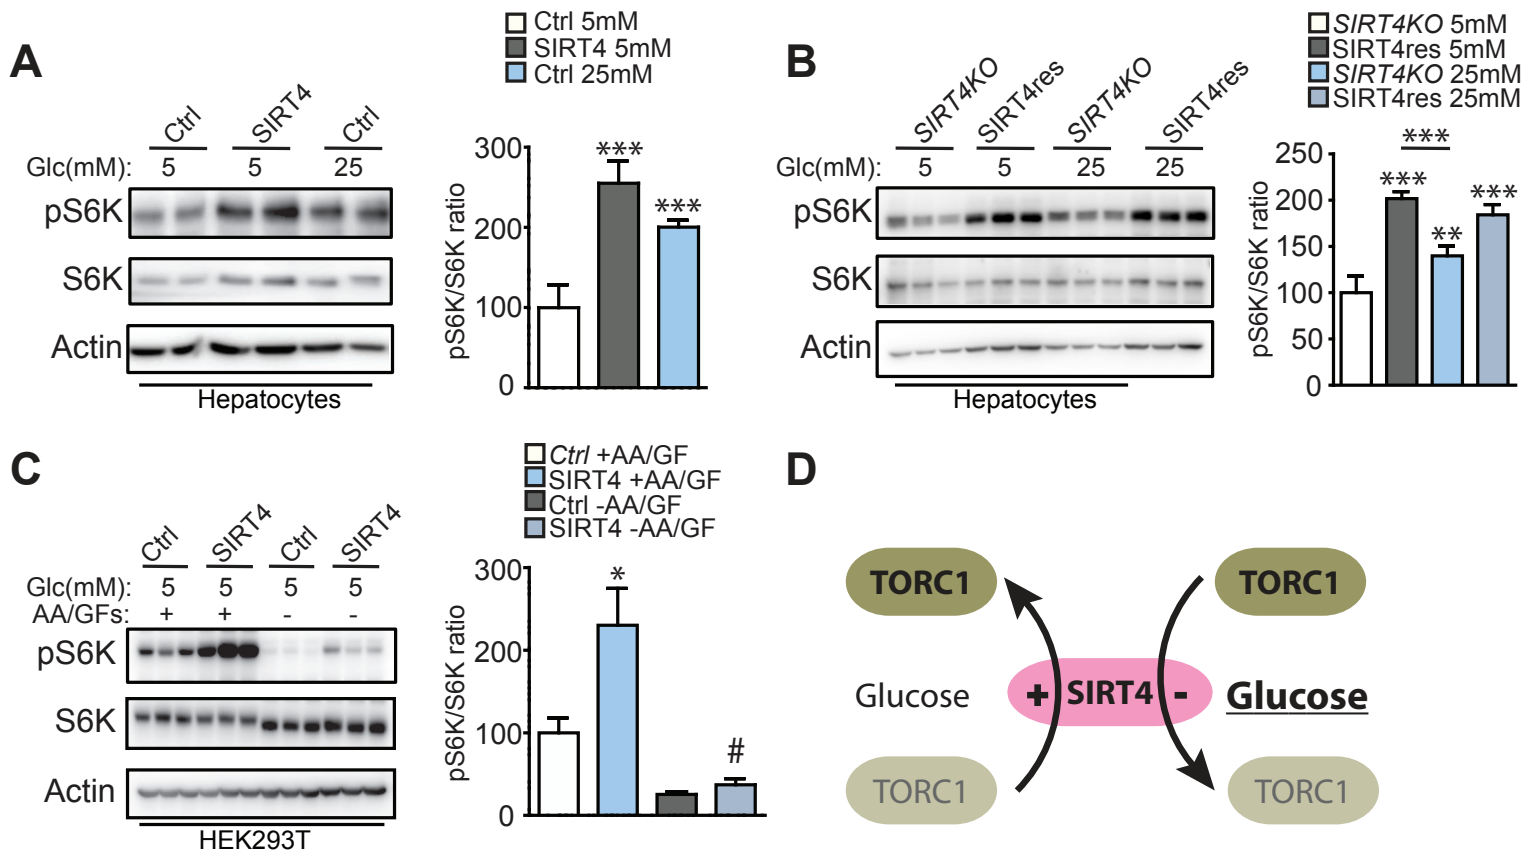

FIGURE 2

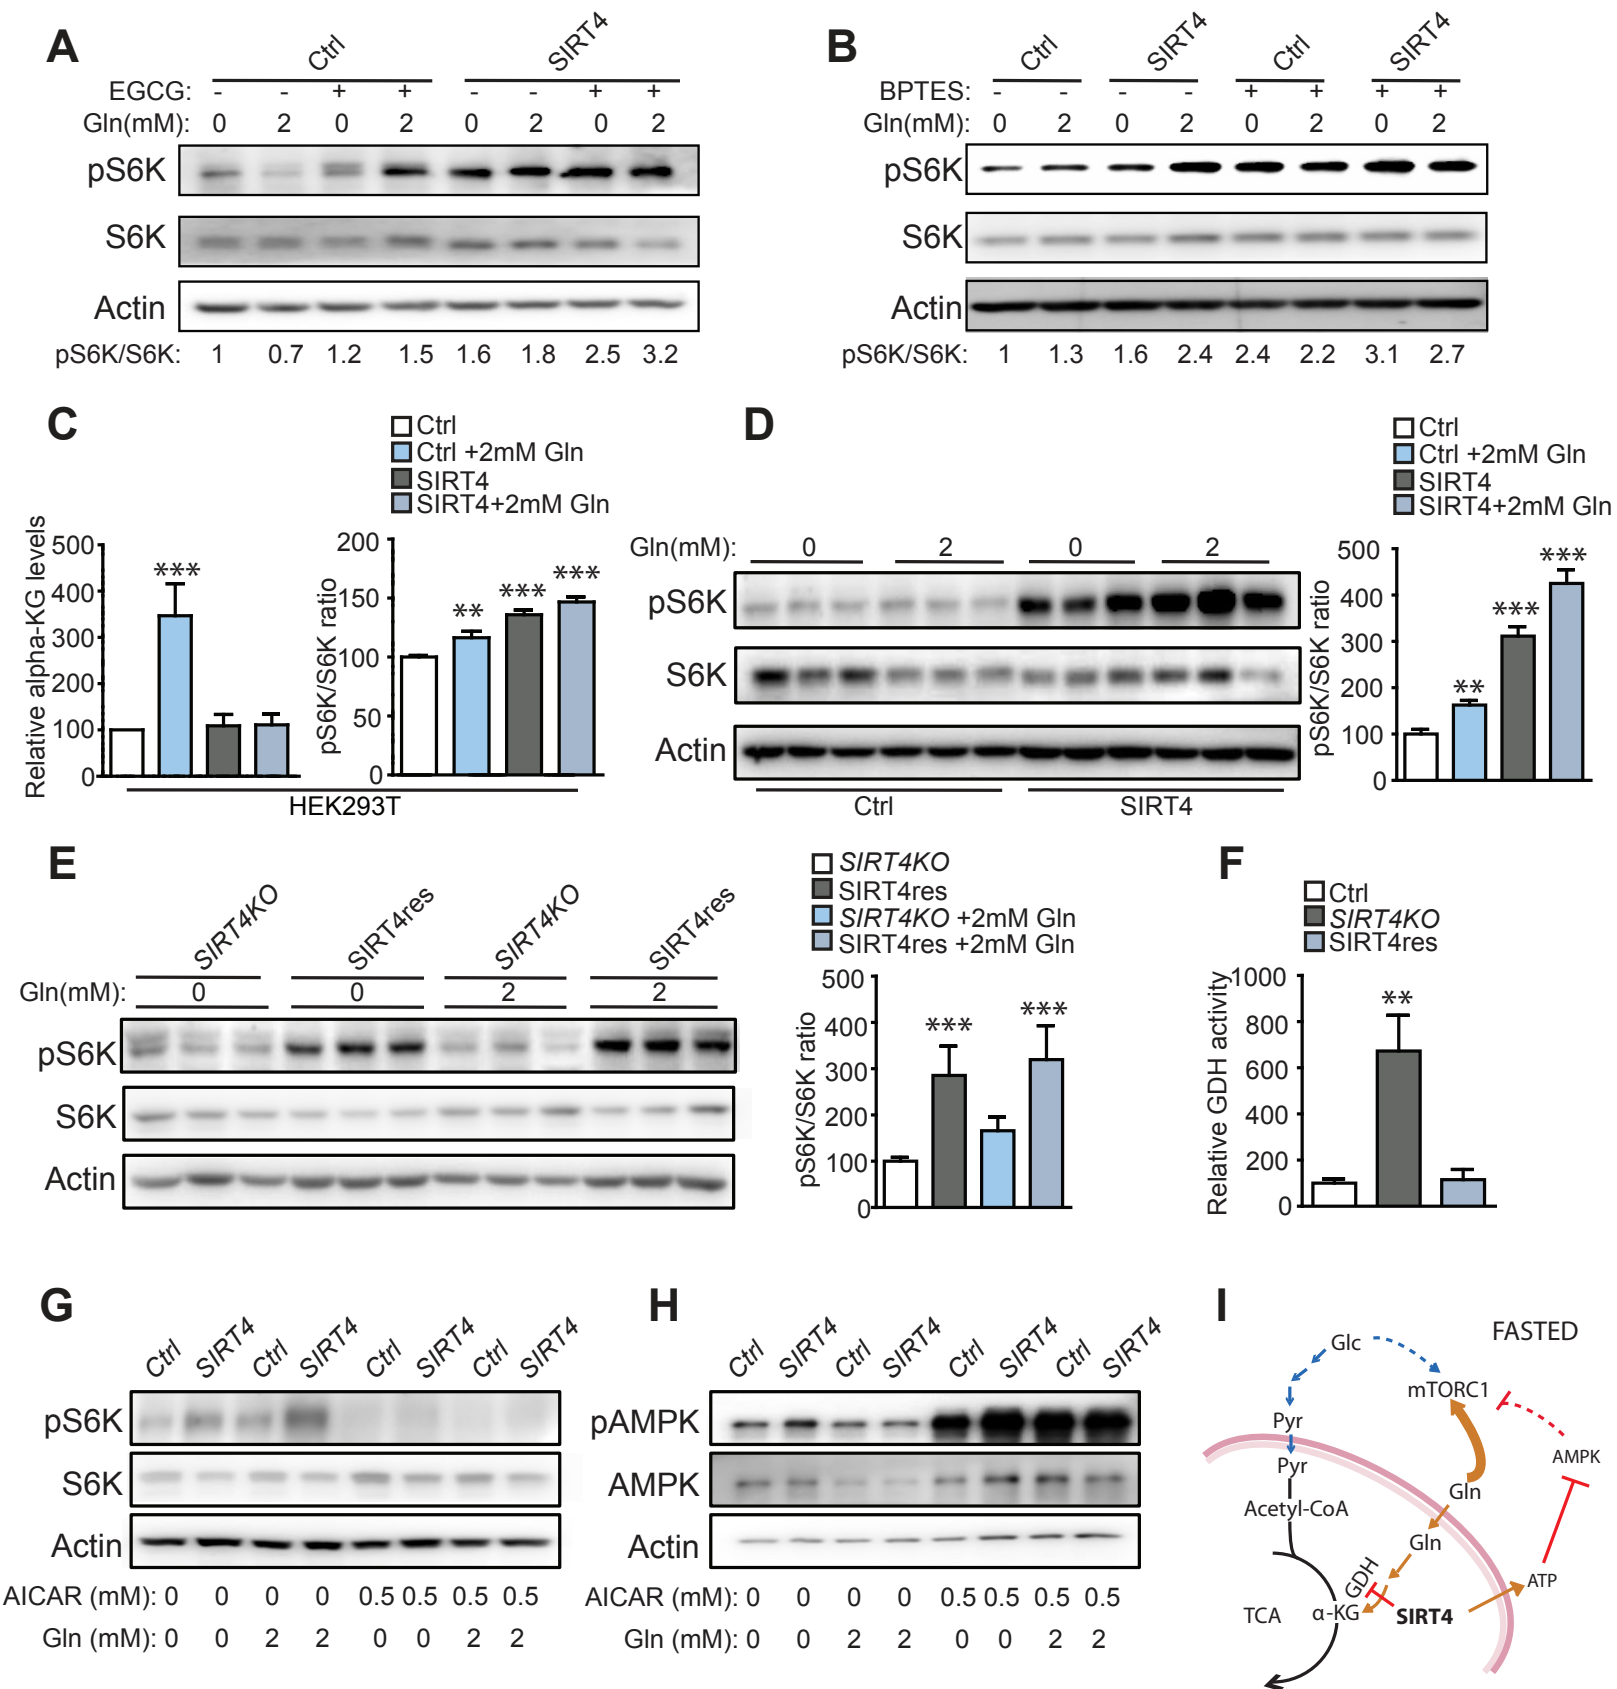

FIGURE 3



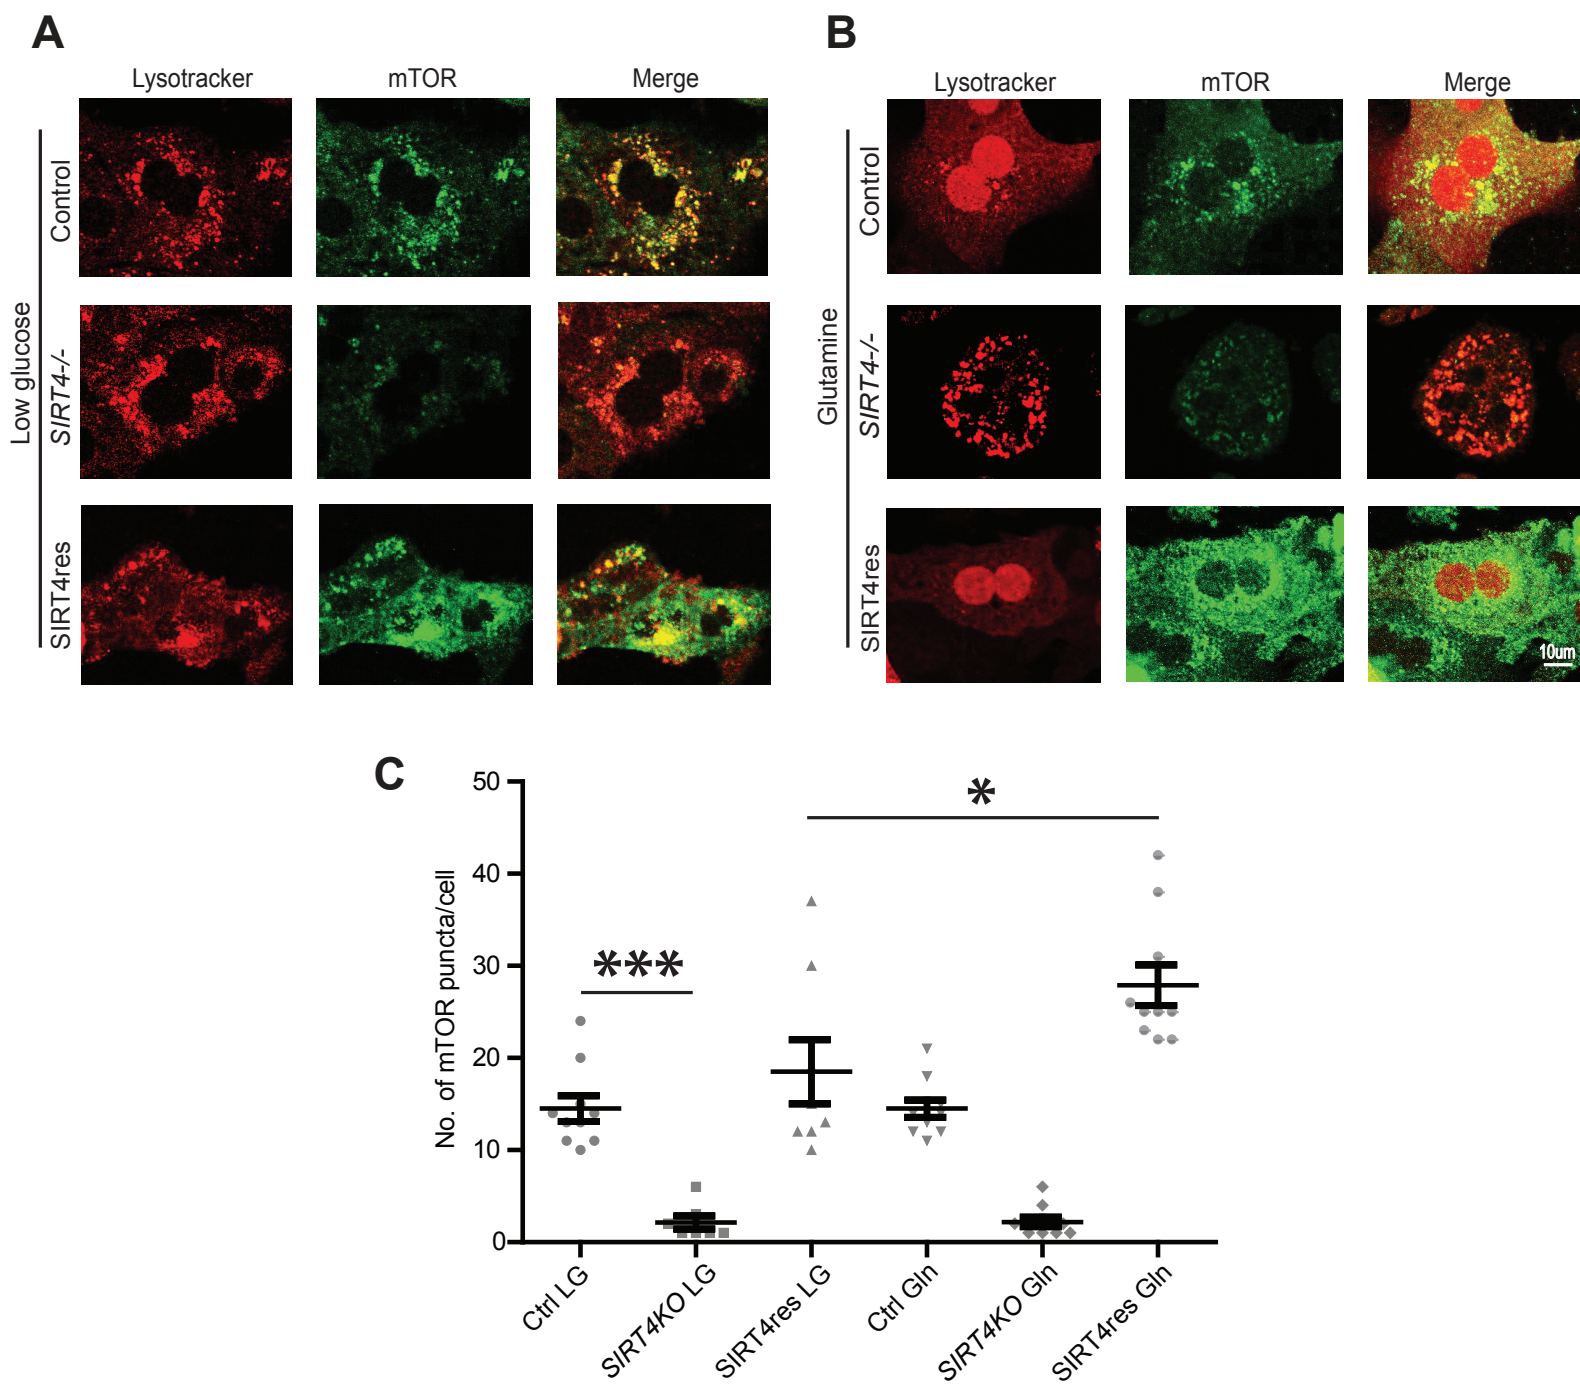

FIGURE 4



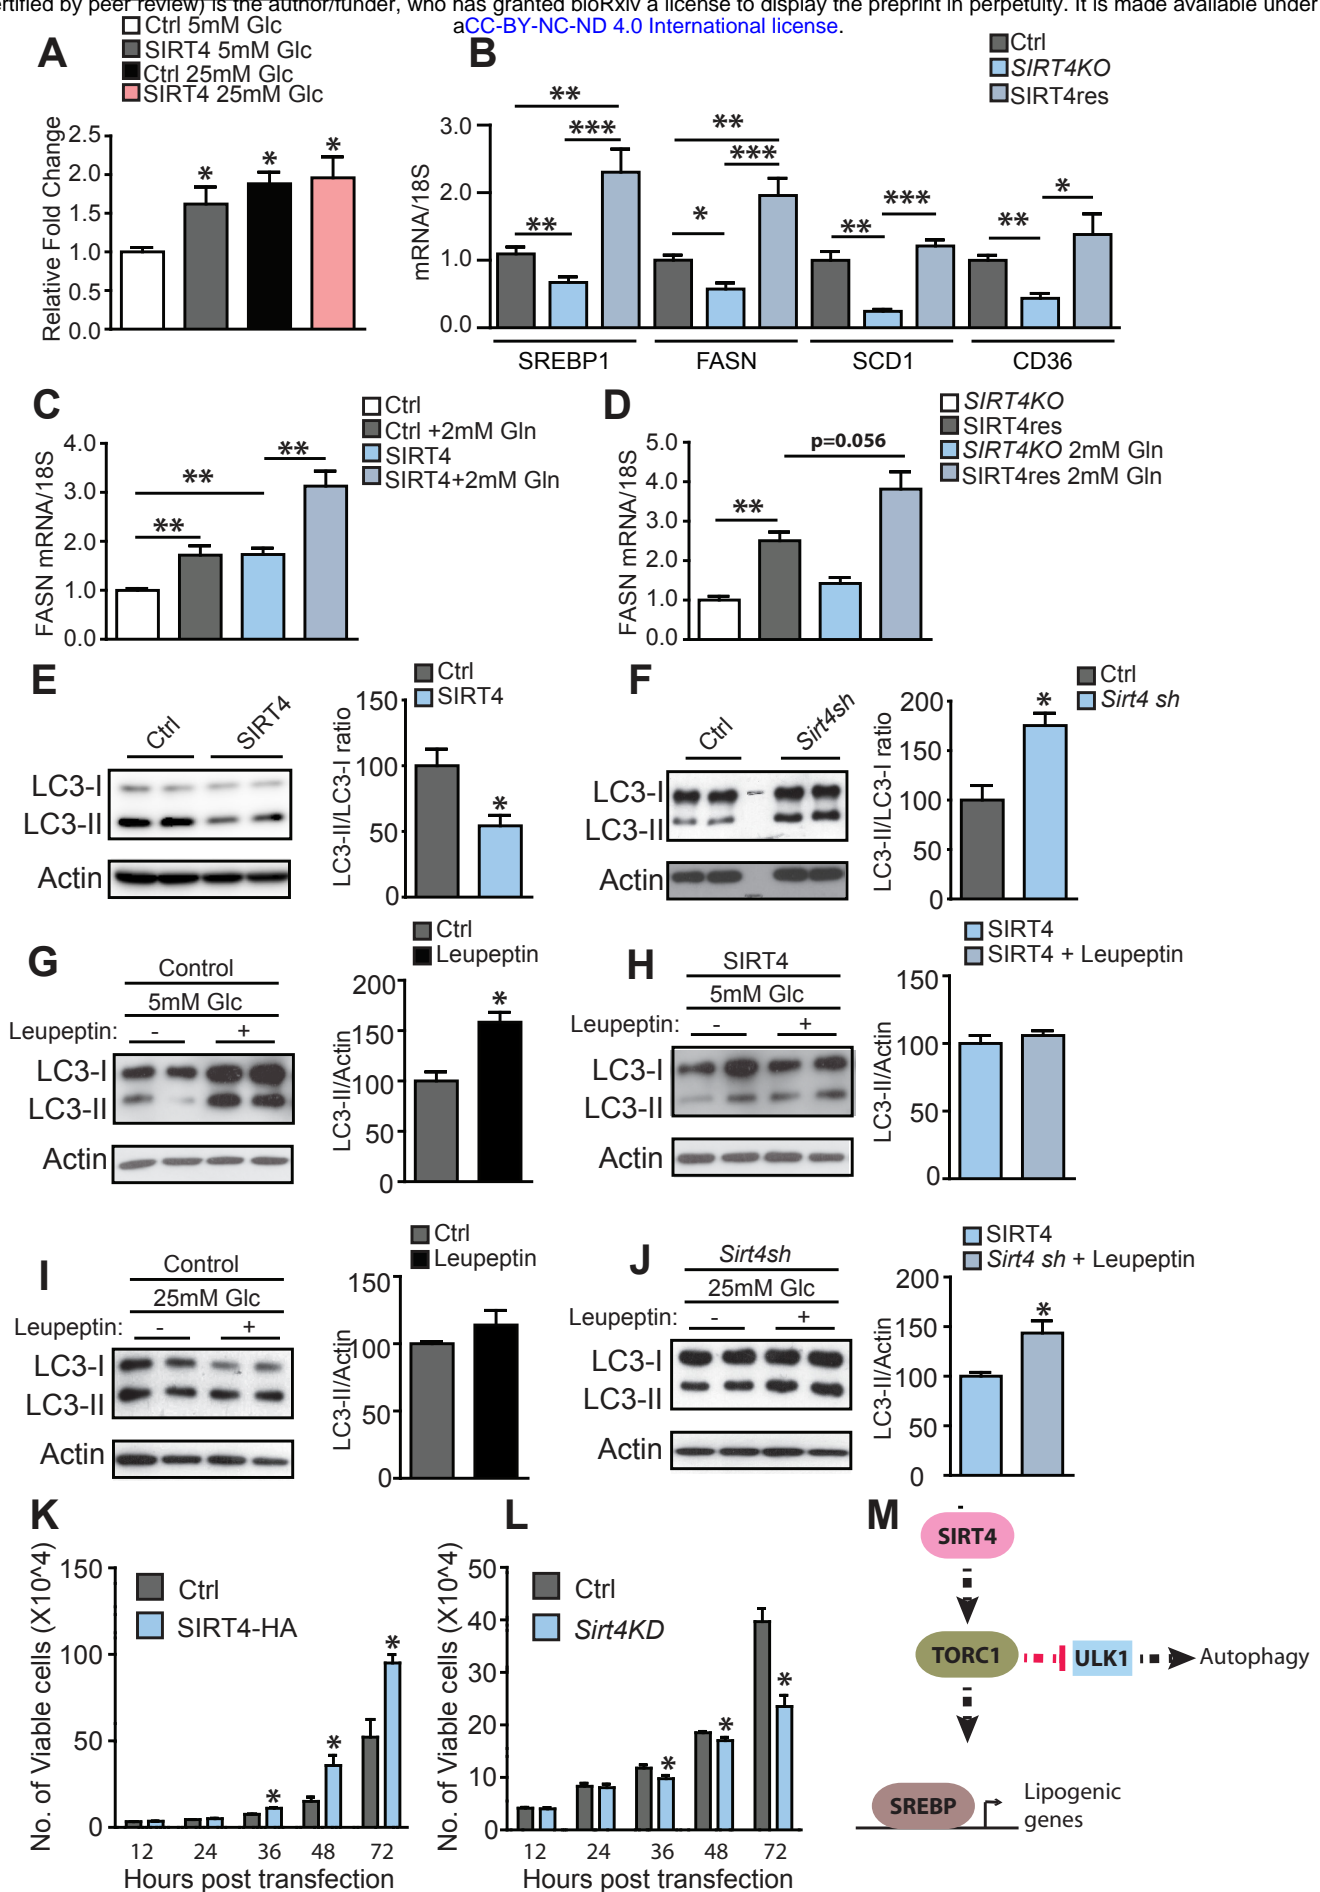

FIGURE 5

### Anabolic SIRT4 activates TORC1 via mitochondrial glutamine sparing

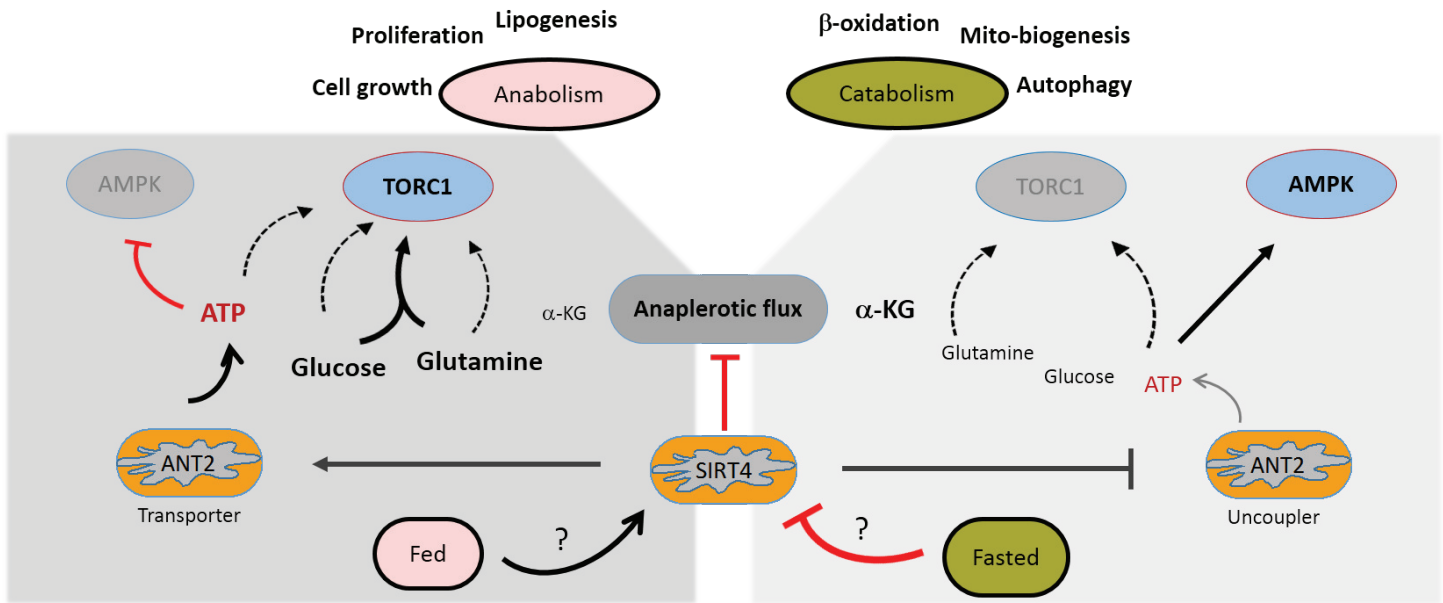

FIGURE 6
